# Supplementary material for: Palladium-catalyzed decarboxylative α-allylation of thiazolidinones and azlactones with sulfonamido-substituted acyclic allylic carbonates
Source: Royal Society of Chemistry journal article supplement (doi:10.1039/d3ob01404e), 2023-01-01

**Palladium-catalyzed decarboxylative  $\alpha$ -allylation of  
thiazolidinones and azlactones with sulfonamido-substituted  
acyclic allylic carbonates**

Han-Wen Rao,<sup>a</sup> Tian-Lan Zhao,<sup>a</sup> Long Wang,<sup>a</sup> Hong-Dan Deng,<sup>a</sup> Yan-Ping Zhang,<sup>a</sup> Yong You,<sup>a</sup>  
Zhen-Hua Wang,<sup>a</sup> Jian-Qiang Zhao,<sup>a,\*</sup> and Wei-Cheng Yuan<sup>a,\*</sup>

<sup>a</sup>Innovation Research Center of Chiral Drugs, Institute for Advanced Study, Chengdu University,  
Chengdu 610106, China.

zhaojianqiang@cdu.edu.cn  
yuanwc@cioc.ac.cn

**Supporting Information**

**Table of Contents**

|                                                                                                    |    |
|----------------------------------------------------------------------------------------------------|----|
| 1. X-Ray crystal data for compound <b>5d</b> .....                                                 | S1 |
| 2. <sup>1</sup> H, <sup>13</sup> C NMR, and HPLC spectra for compounds <b>3</b> and <b>5</b> ..... | S2 |

## 1. X-Ray crystal data for compound **5d**

Single crystal of compound **5d** was prepared from the mixture solvent of EtOH and CH<sub>2</sub>Cl<sub>2</sub>. A suitable crystal was selected for structure determination on a Xcalibur, Eos, Gemini diffractometer. The crystal was kept at 293(2) K during data collection. Using Olex2, the structure was solved with the ShelXS structure solution program using Direct Methods and refined with the ShelXLrefinement package using Least Squares minimisation.

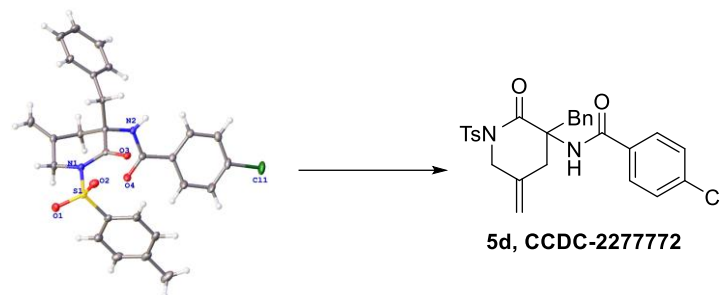

ORTEP of **5d** (at 50% level)

### Crystal data and structure refinement for **5d** (CCDC-2277772)

|                                             |                                                                   |
|---------------------------------------------|-------------------------------------------------------------------|
| Identification code                         | <b>5d</b>                                                         |
| Empirical formula                           | C <sub>27</sub> H <sub>25</sub> ClN <sub>2</sub> O <sub>4</sub> S |
| Formula weight                              | 509.00                                                            |
| Temperature/K                               | 99.98(10)                                                         |
| Crystal system                              | triclinic                                                         |
| Space group                                 | P-1                                                               |
| a/Å                                         | 10.1642(2)                                                        |
| b/Å                                         | 11.1077(2)                                                        |
| c/Å                                         | 12.6071(2)                                                        |
| α/°                                         | 67.633(2)                                                         |
| β/°                                         | 85.5240(10)                                                       |
| γ/°                                         | 70.287(2)                                                         |
| Volume/Å <sup>3</sup>                       | 1237.06(4)                                                        |
| Z                                           | 2                                                                 |
| ρ <sub>calc</sub> /g/cm <sup>3</sup>        | 1.366                                                             |
| μ/mm <sup>-1</sup>                          | 2.460                                                             |
| F(000)                                      | 532.0                                                             |
| Crystal size/mm <sup>3</sup>                | 0.14 × 0.12 × 0.11                                                |
| Radiation                                   | Cu Kα (λ = 1.54184)                                               |
| 2θ range for data collection/°              | 7.596 to 143.032                                                  |
| Index ranges                                | -12 ≤ h ≤ 10, -13 ≤ k ≤ 13, -15 ≤ l ≤ 15                          |
| Reflections collected                       | 12363                                                             |
| Independent reflections                     | 4679 [R <sub>int</sub> = 0.0207, R <sub>sigma</sub> = 0.0184]     |
| Data/restraints/parameters                  | 4679/0/329                                                        |
| Goodness-of-fit on F <sup>2</sup>           | 1.050                                                             |
| Final R indexes [I ≥ 2σ (I)]                | R <sub>1</sub> = 0.0365, wR <sub>2</sub> = 0.0976                 |
| Final R indexes [all data]                  | R <sub>1</sub> = 0.0373, wR <sub>2</sub> = 0.0982                 |
| Largest diff. peak/hole / e Å <sup>-3</sup> | 0.34/-0.54                                                        |

## 2. $^1\text{H}$ and $^{13}\text{C}$ NMR spectra for compounds 3 and 5

### $^1\text{H}$ and $^{13}\text{C}$ NMR spectra for compound 3a

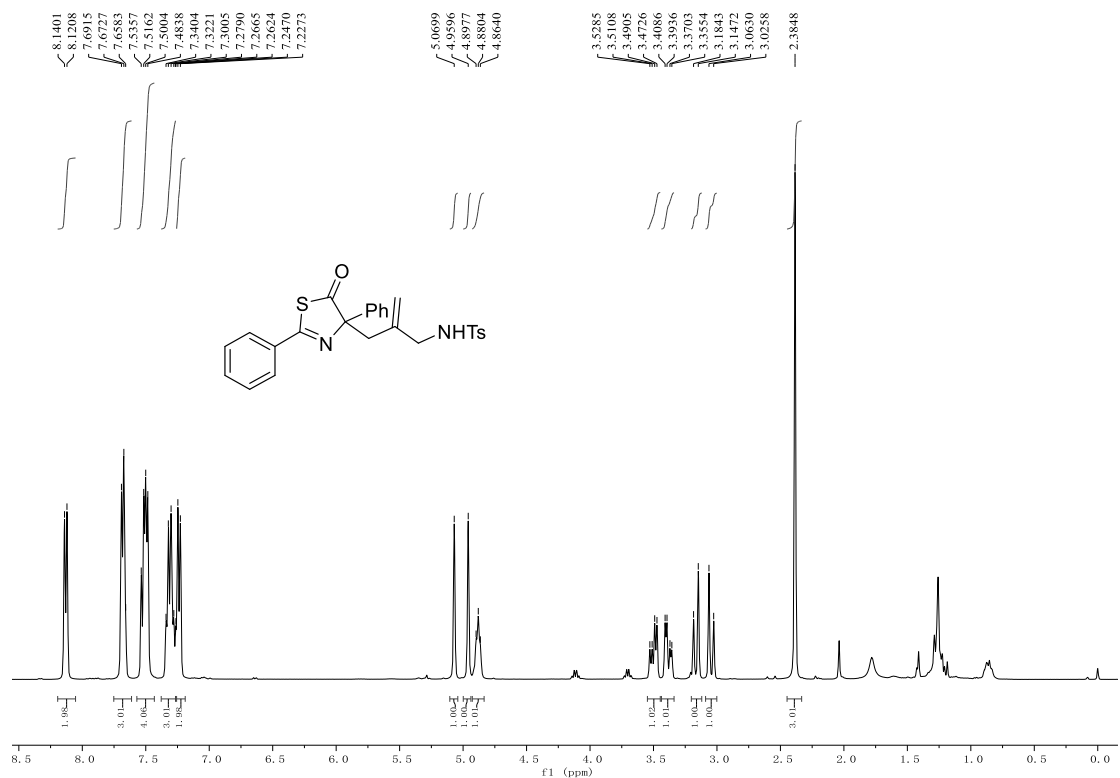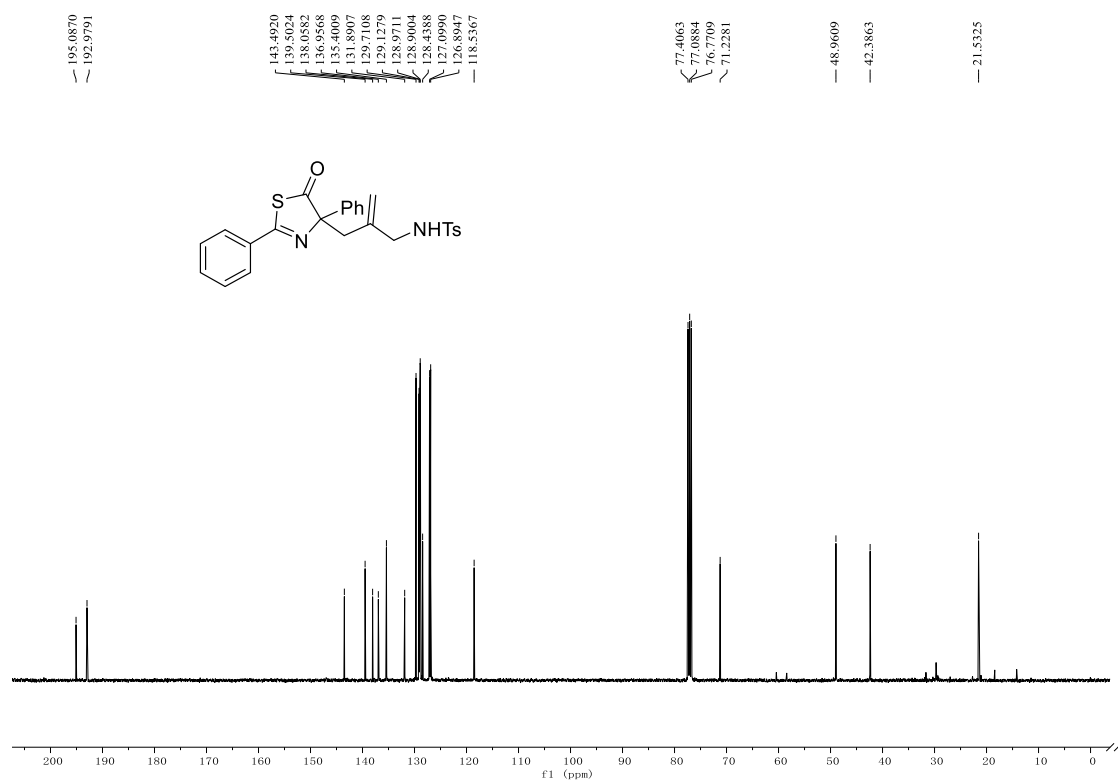

# <sup>1</sup>H and <sup>13</sup>C NMR spectra for compound 3b

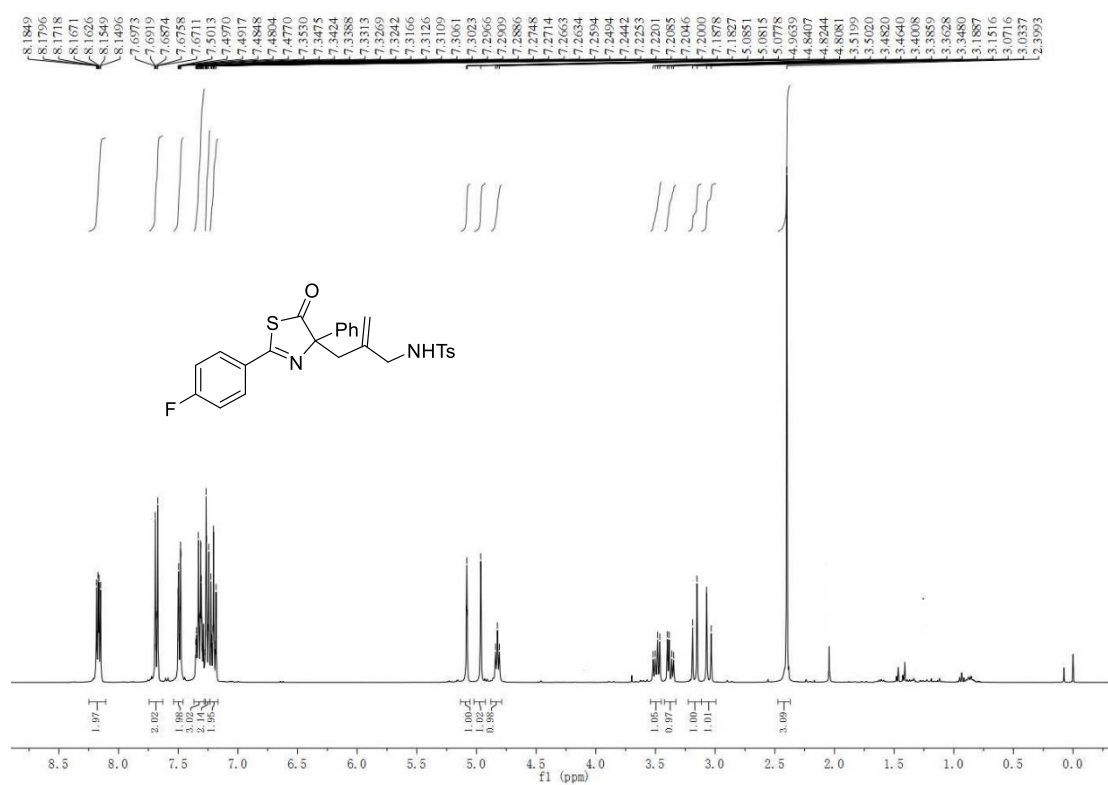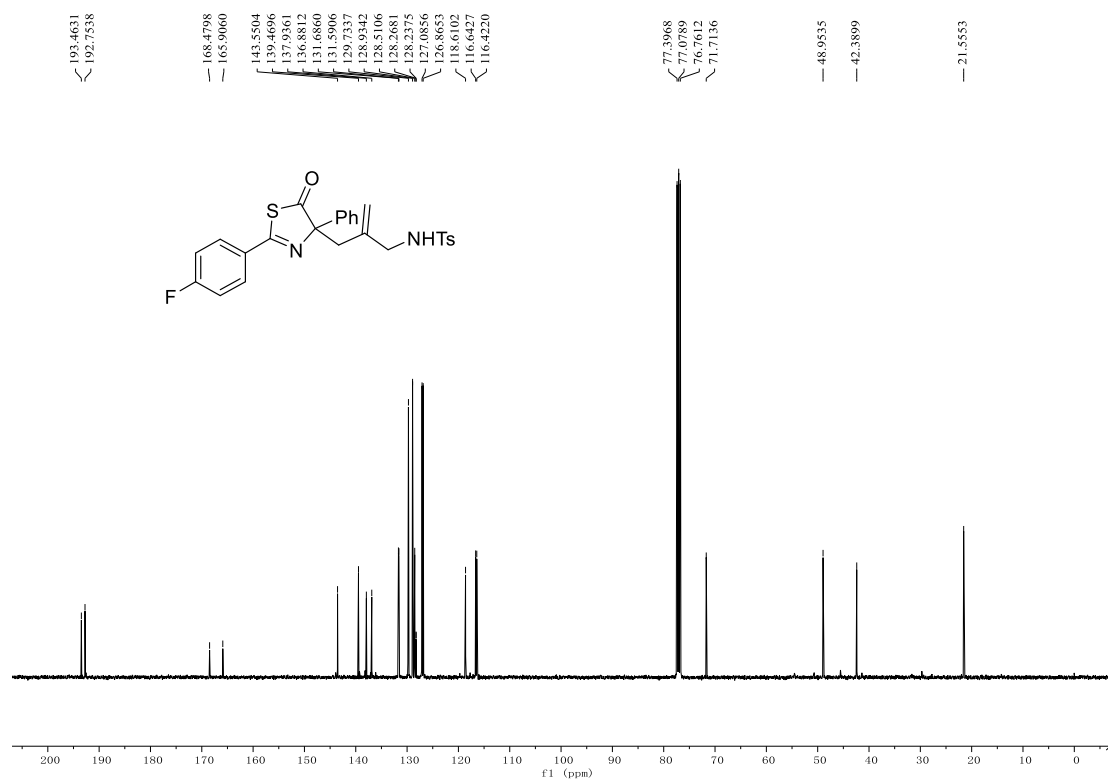

**$^{19}\text{F}$  NMR spectra for compound 3b**

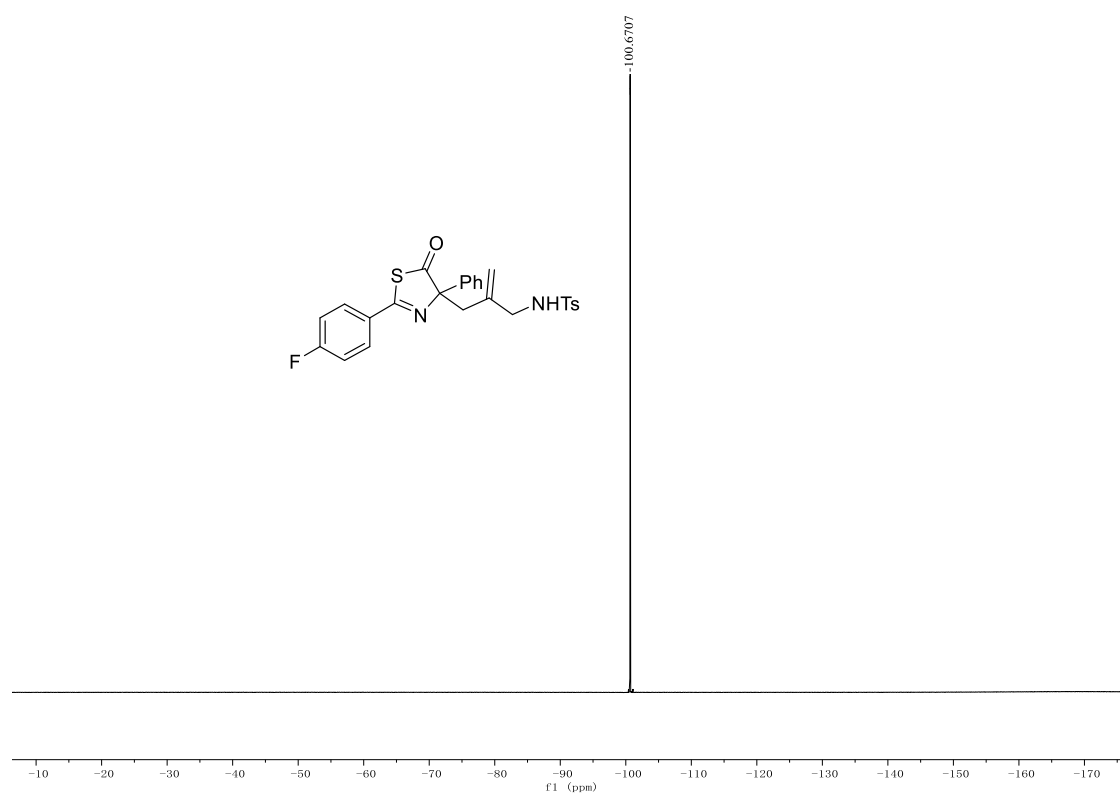

# <sup>1</sup>H and <sup>13</sup>C NMR spectra for compound 3c

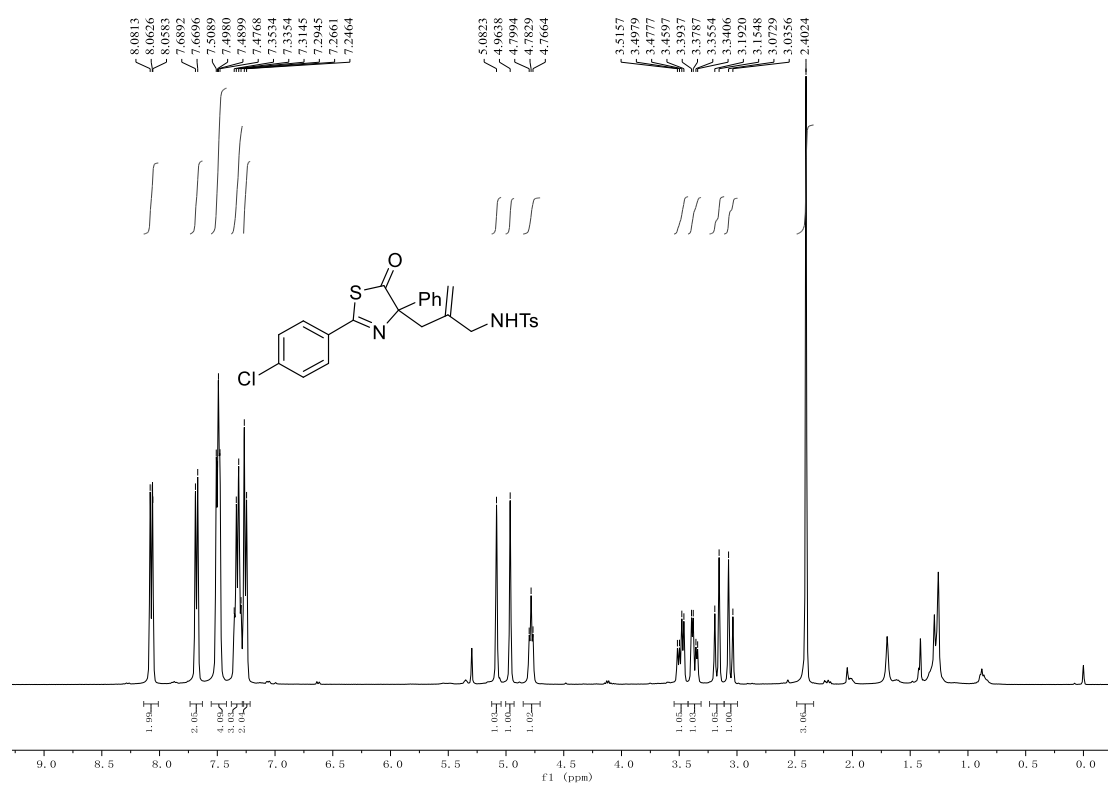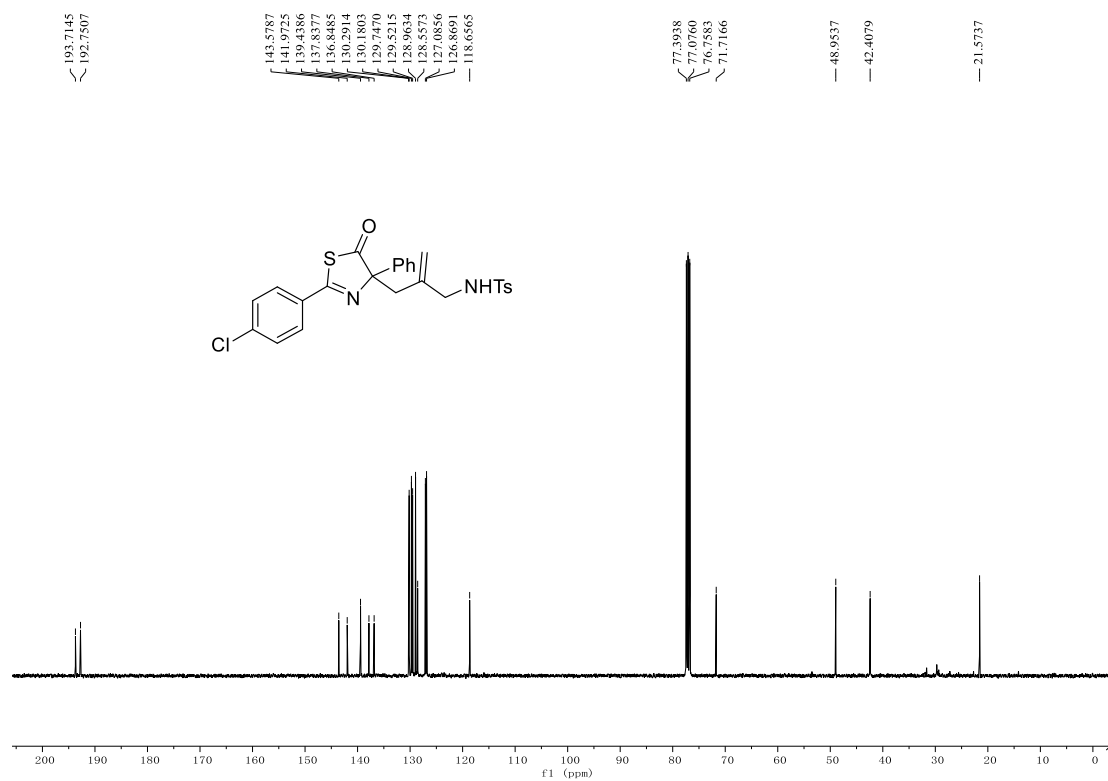

# <sup>1</sup>H and <sup>13</sup>C NMR spectra for compound 3d

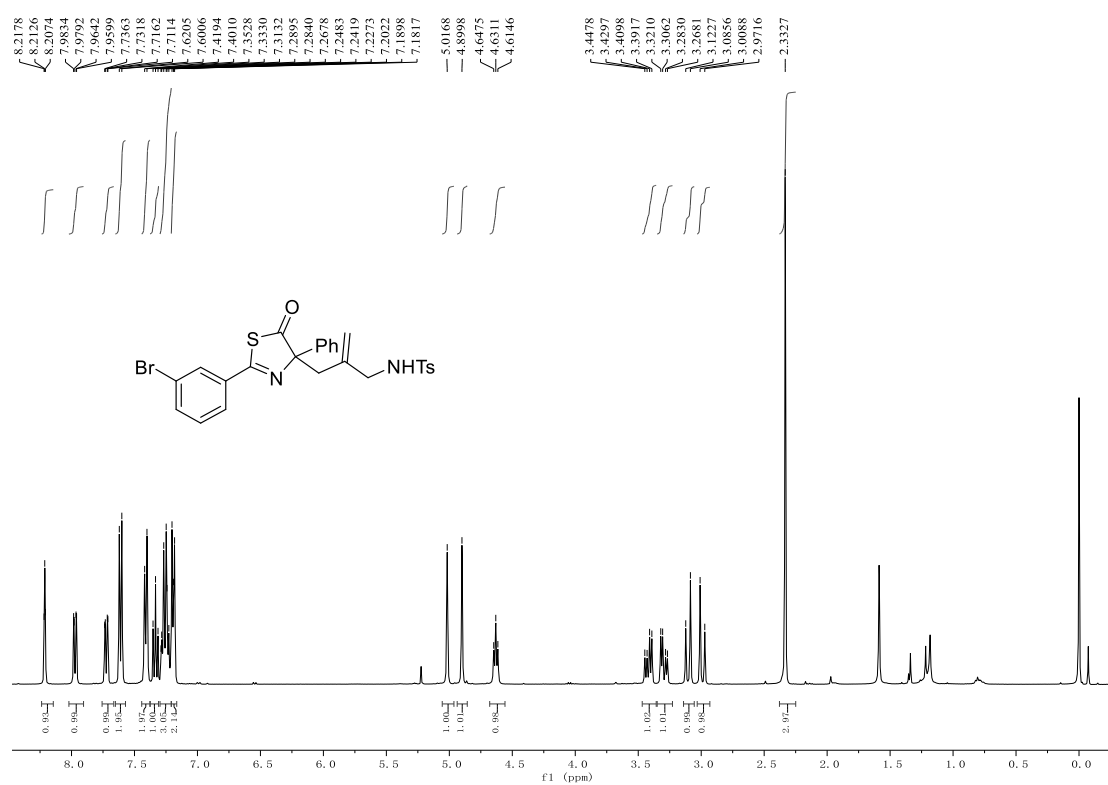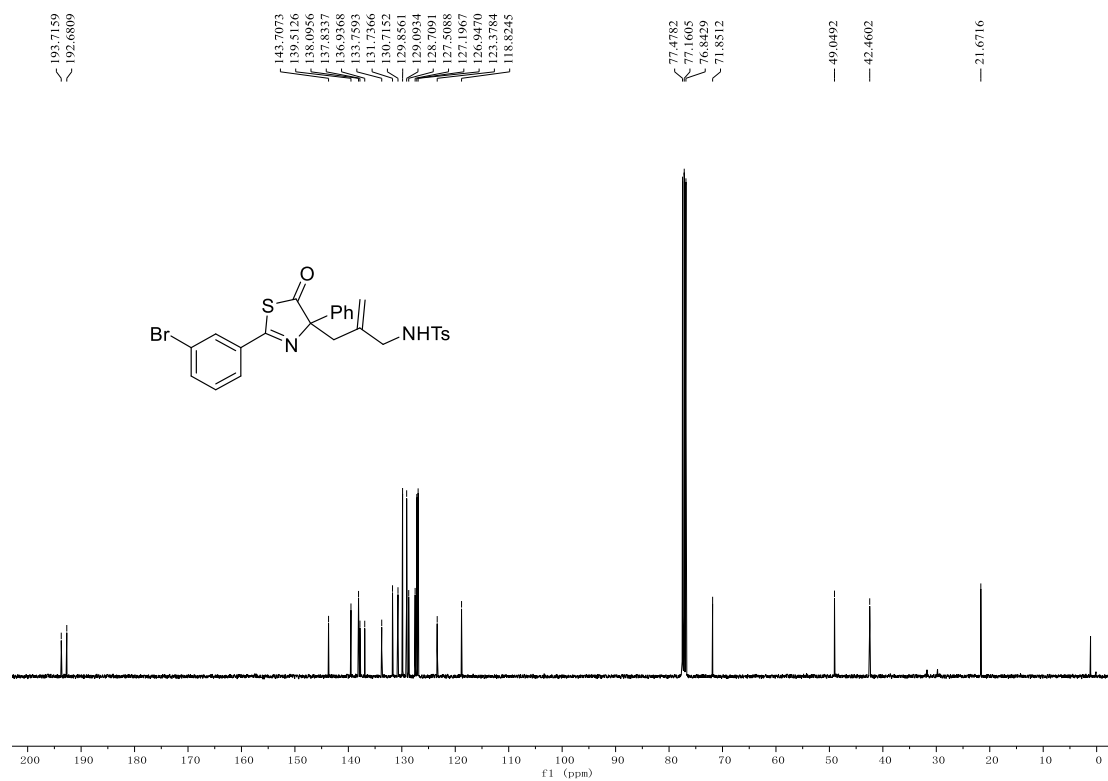

# <sup>1</sup>H and <sup>13</sup>C NMR spectra for compound 3e

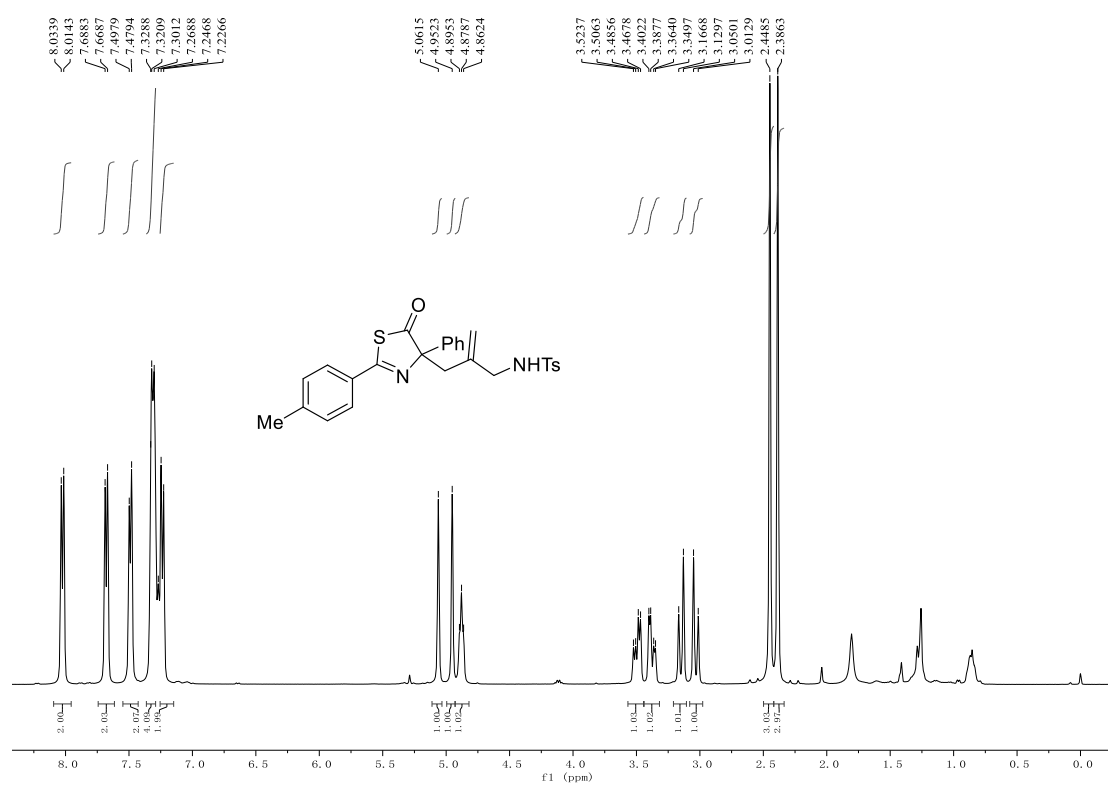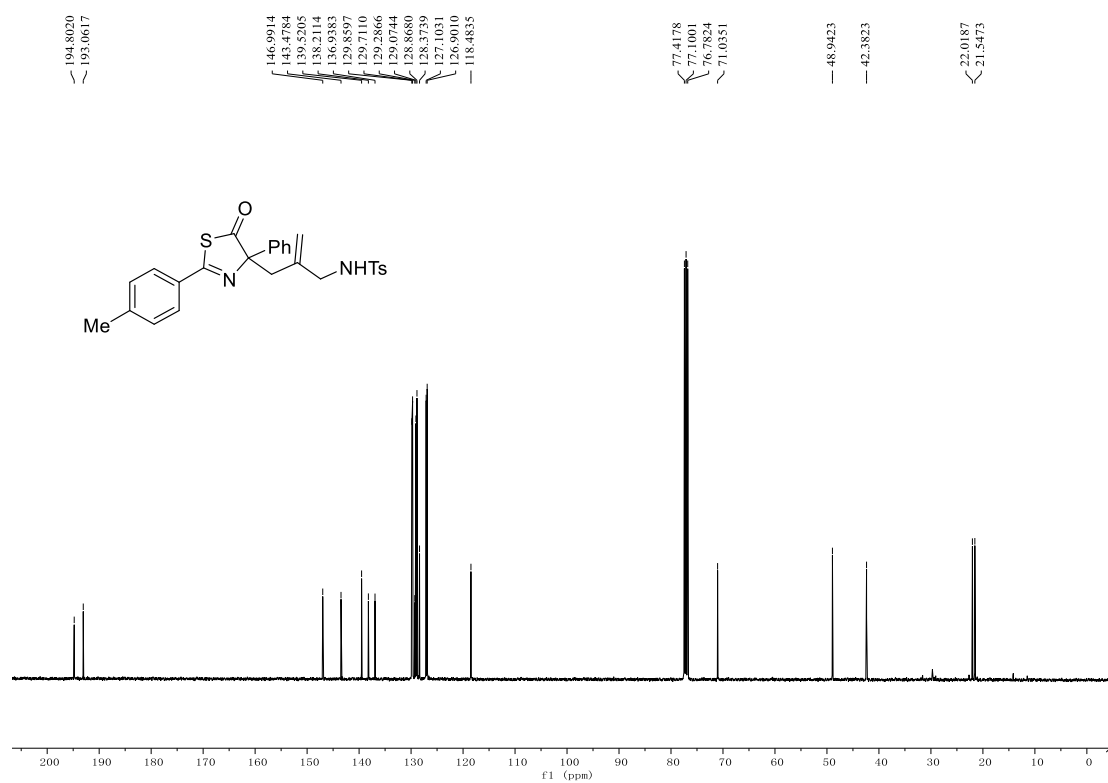

Chemical structure of compound 10: CC1(C)OC(=O)N1Cc2ccccc2

<sup>1</sup>H NMR spectrum (CDCl<sub>3</sub>) of compound 10. The x-axis represents the chemical shift in ppm, ranging from 0.0 to 8.5. The spectrum shows several peaks corresponding to the structure, with integration values provided for some of the signals.

Chemical shift data (ppm):

- 7.938, 7.9353, 7.9157, 7.9022, 7.8925, 7.9037, 7.8849, 7.4366, 7.4073, 7.3880, 7.3466, 7.3287, 7.3092, 7.3013, 7.2857, 7.2582, 7.2370
- 5.0741, 4.9720, 4.7626, 4.7461, 4.7297
- 3.5343, 3.5165, 3.4984, 3.4783, 3.4622, 3.3924, 3.3691, 3.3543, 3.1725, 3.1354, 3.0692, 3.0321, 2.4343, 2.3942

Integration values (from left to right):

- 0.97, 1.00, 1.96, 2.98, 1.08, 2.27, 2.27
- 1.00, 0.98, 1.00
- 1.00, 1.00, 1.00, 0.99
- 3.06, 2.96

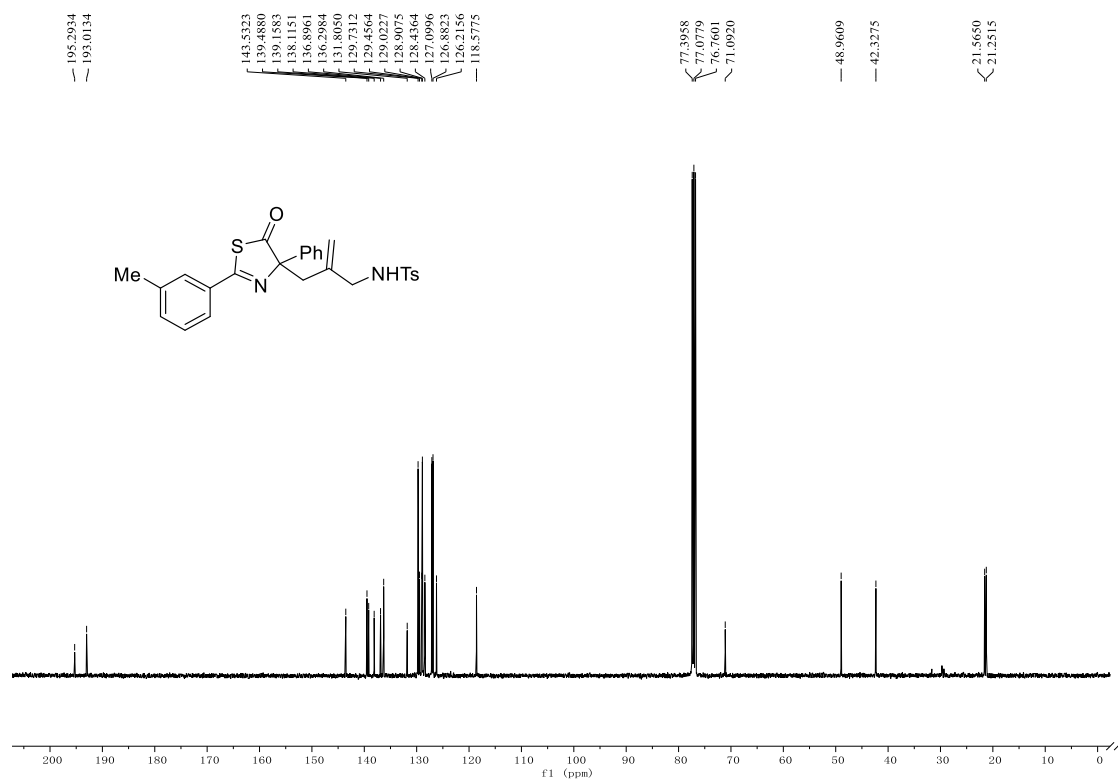

# <sup>1</sup>H and <sup>13</sup>C NMR spectra for compound 3g

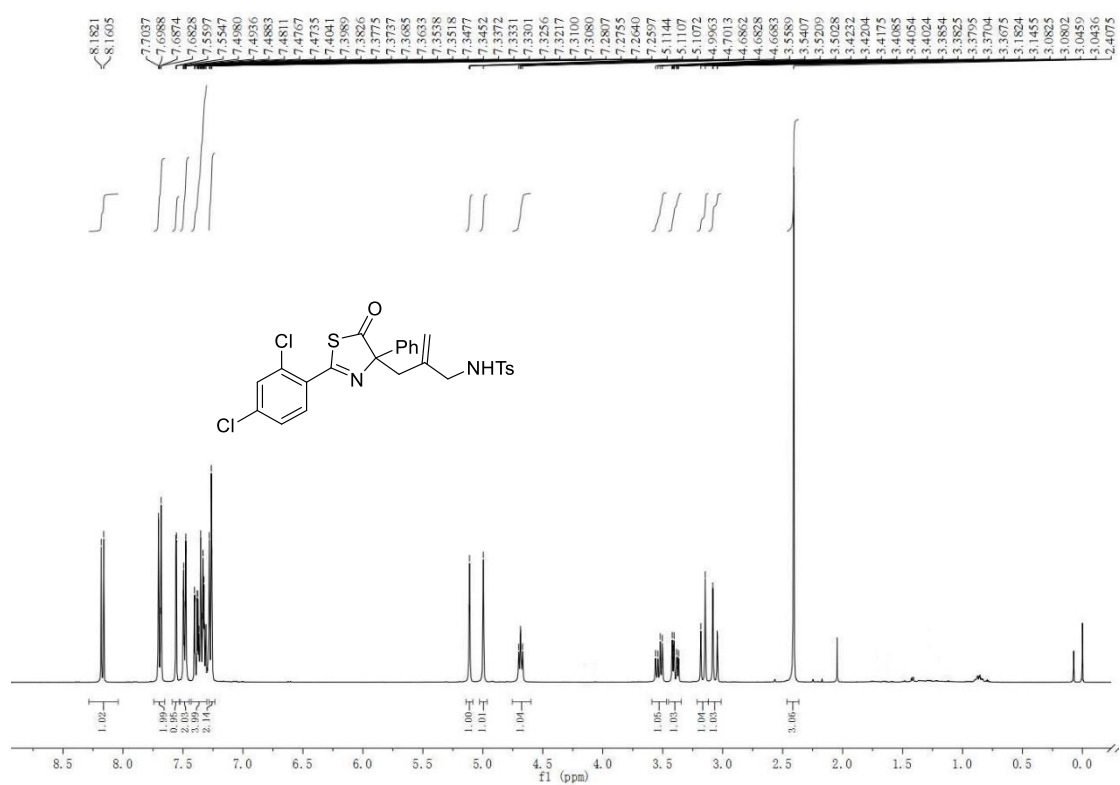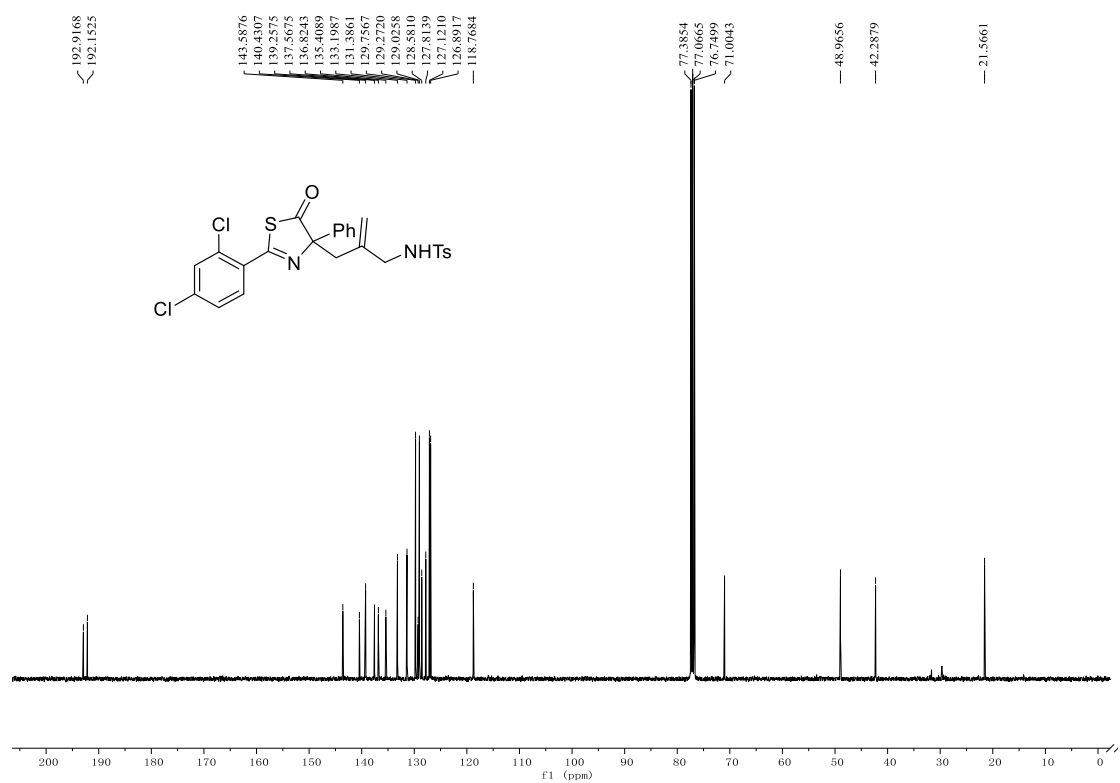

# <sup>1</sup>H and <sup>13</sup>C NMR spectra for compound 3h

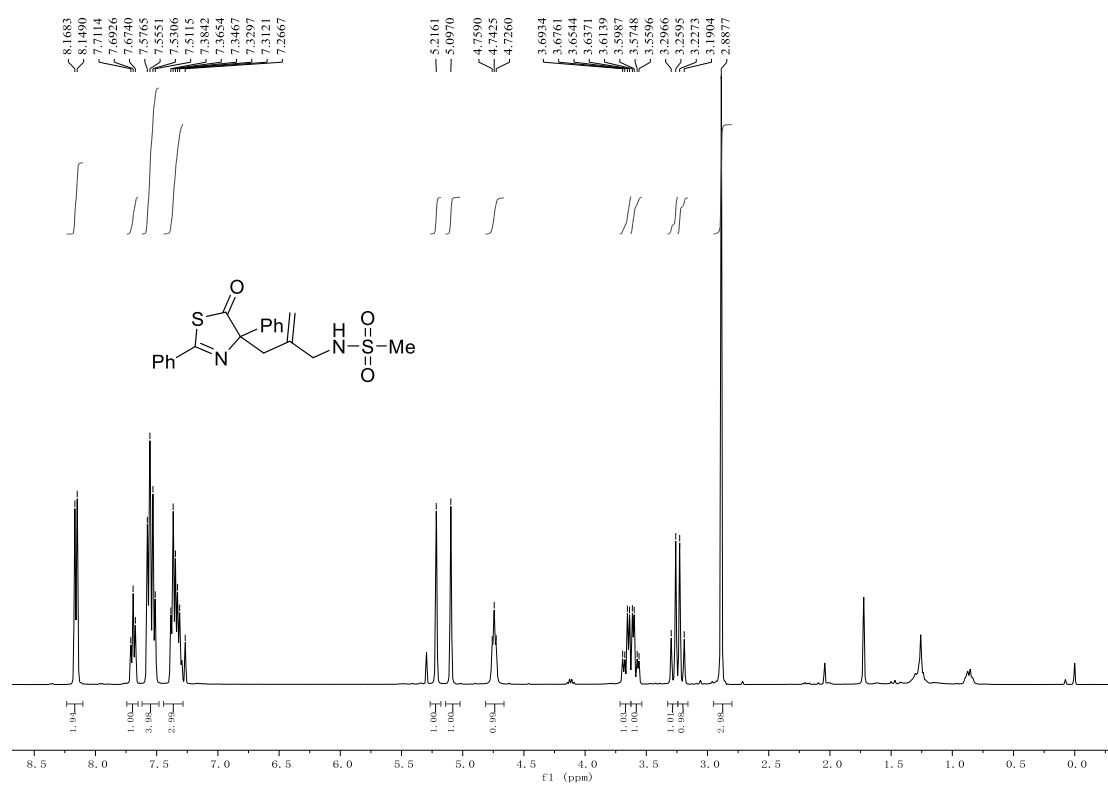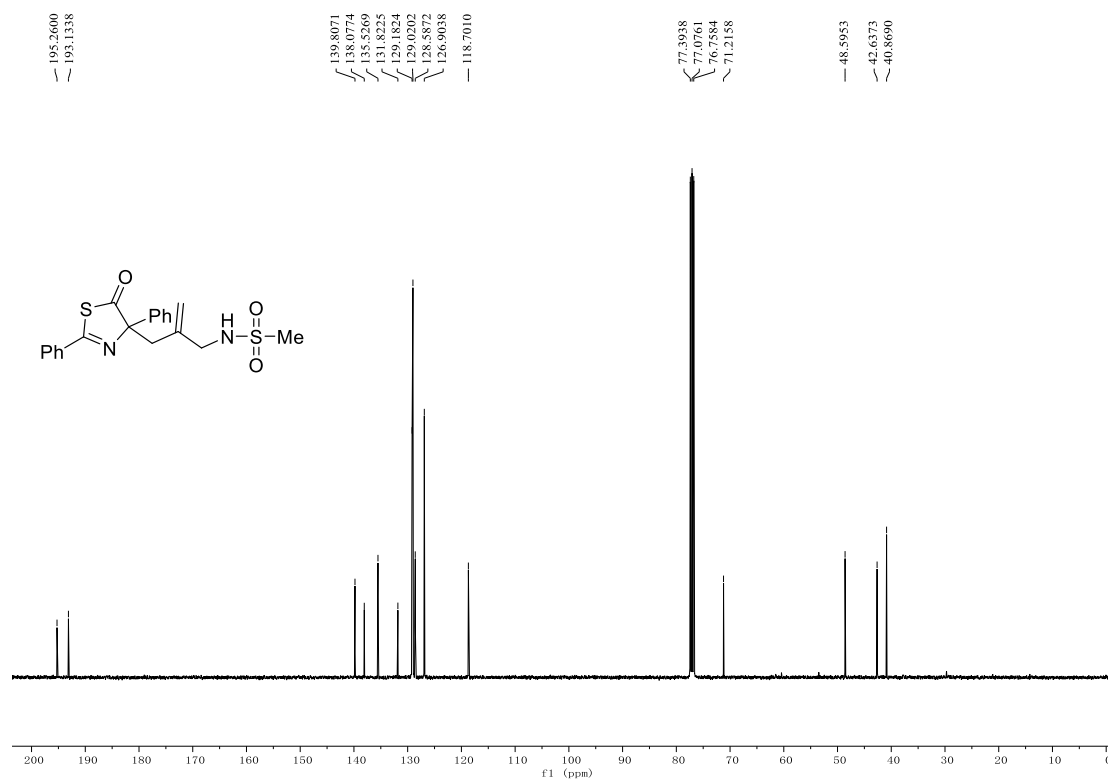

Chemical structure of compound 10 is shown above the spectrum. The spectrum displays peaks corresponding to the structure, with integration values indicated below the baseline. The x-axis represents the chemical shift in ppm, ranging from 0.0 to 8.5.

Peak list (ppm): 8.1738, 8.1545, 7.7126, 7.6938, 7.6751, 7.5832, 7.5636, 7.5520, 7.5332, 7.5141, 7.3877, 7.3689, 7.3470, 7.3280, 7.3115, 7.2928, 7.2680, 5.2241, 5.0807, 4.6493, 4.6331, 4.6171, 3.7141, 3.6968, 3.6748, 3.6574, 3.6356, 3.6204, 3.5964, 3.5813, 3.3212, 3.2841, 3.2228, 3.1957, 2.3686, 2.3607, 2.3491, 2.3369, 2.3289, 1.1209, 1.1079, 1.0901, 1.0804, 0.9305, 0.9104.

Integration values (from left to right): 2.00, 1.02, 4.06, 3.05, 1.04, 1.00, 1.07, 2.06, 1.00, 1.07, 2.16, 2.21.

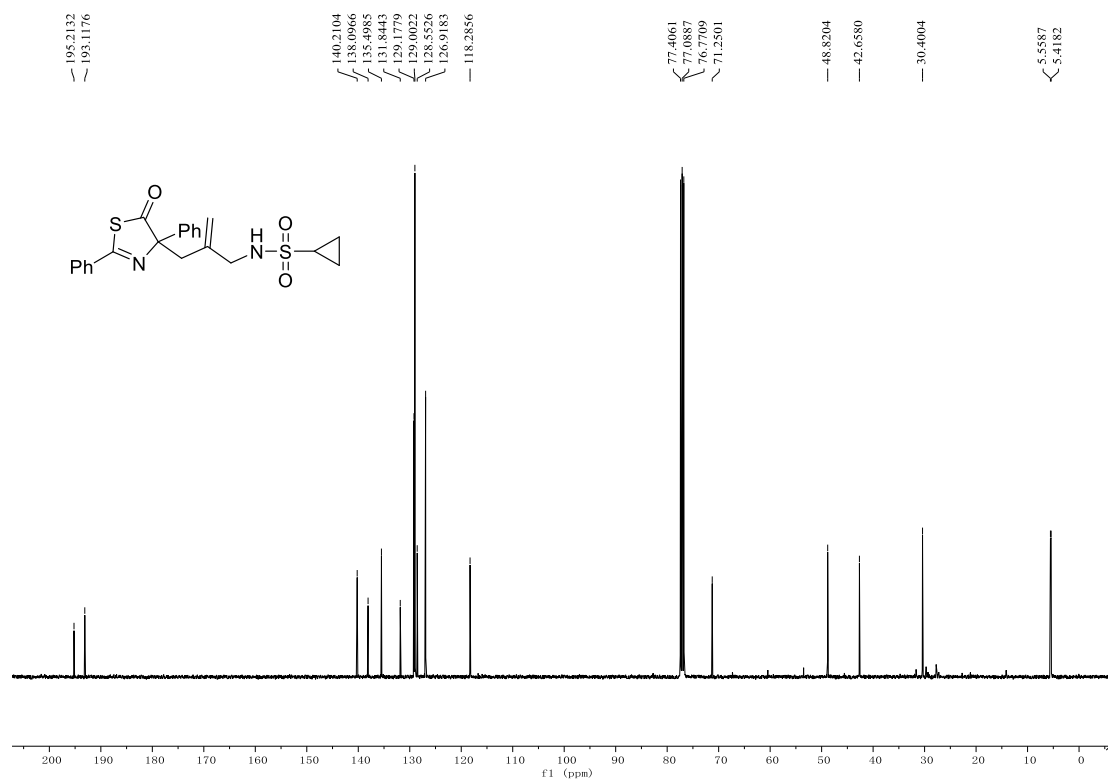

# <sup>1</sup>H and <sup>13</sup>C NMR spectra for compound 3j

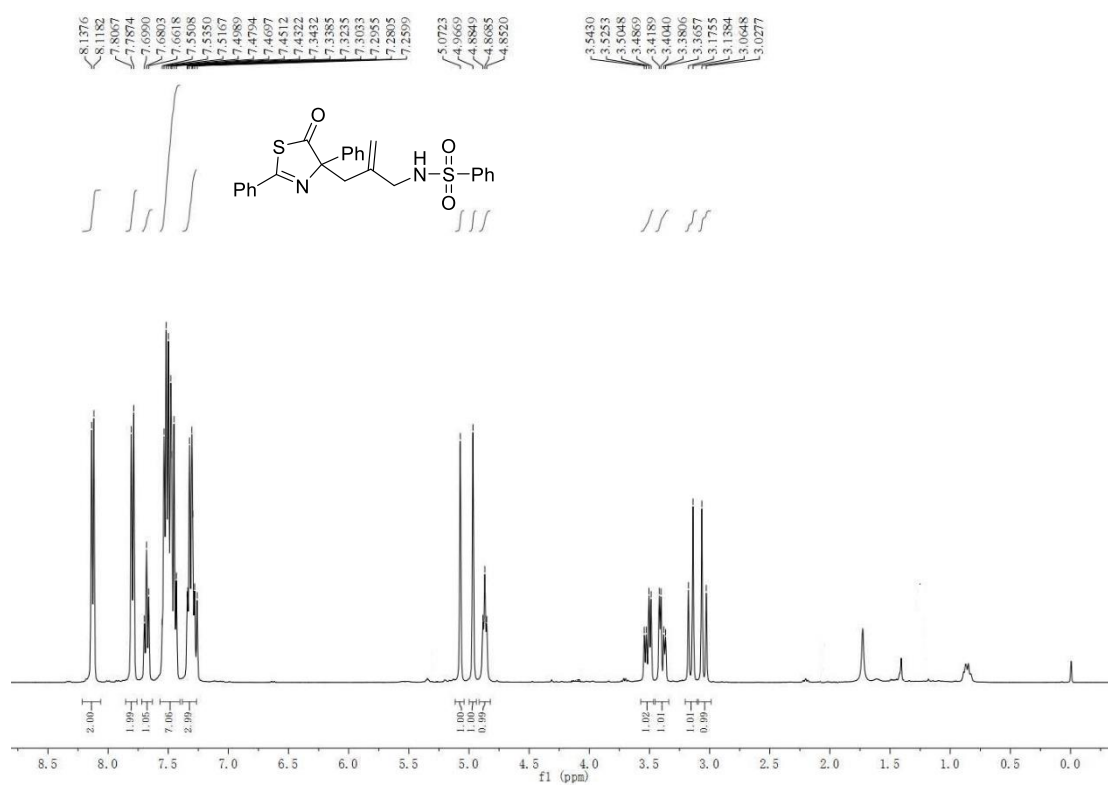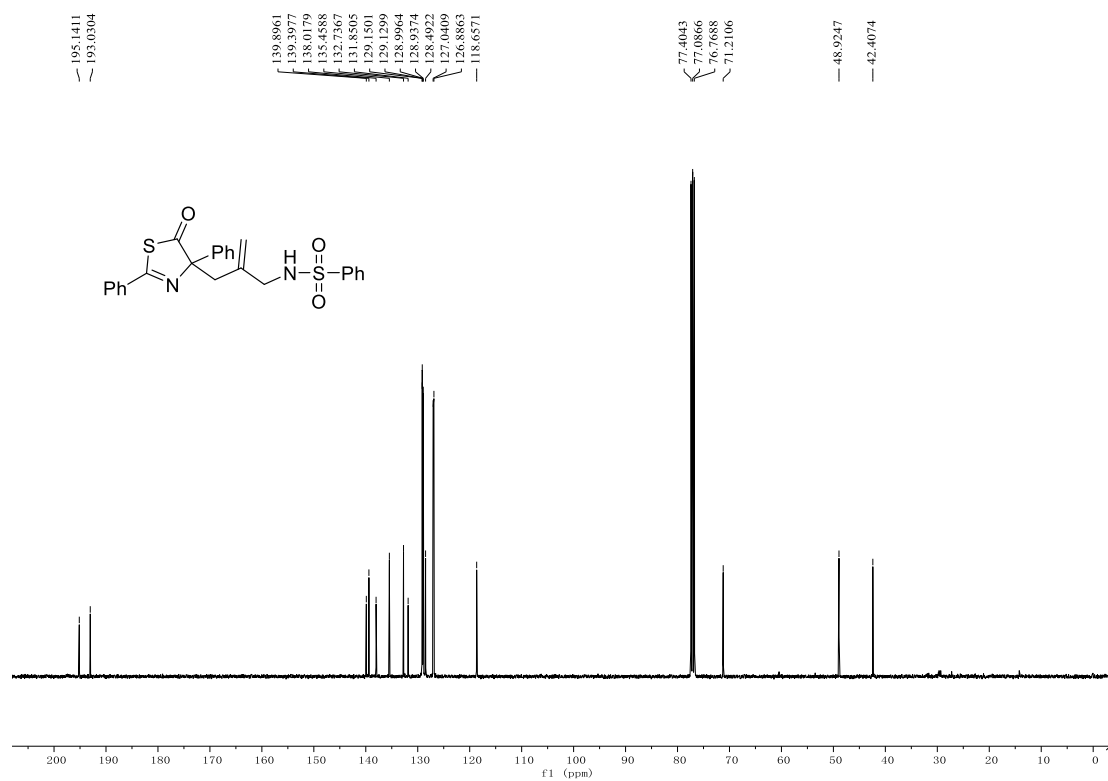

# <sup>1</sup>H and <sup>13</sup>C NMR spectra for compound 3k

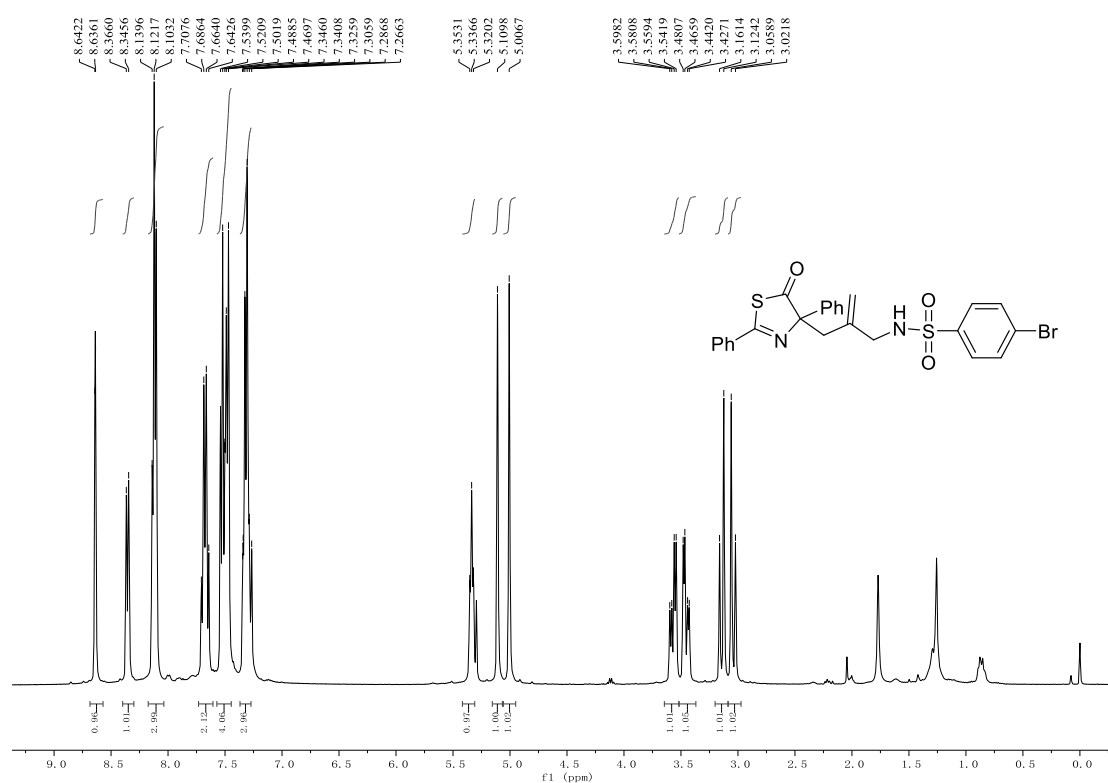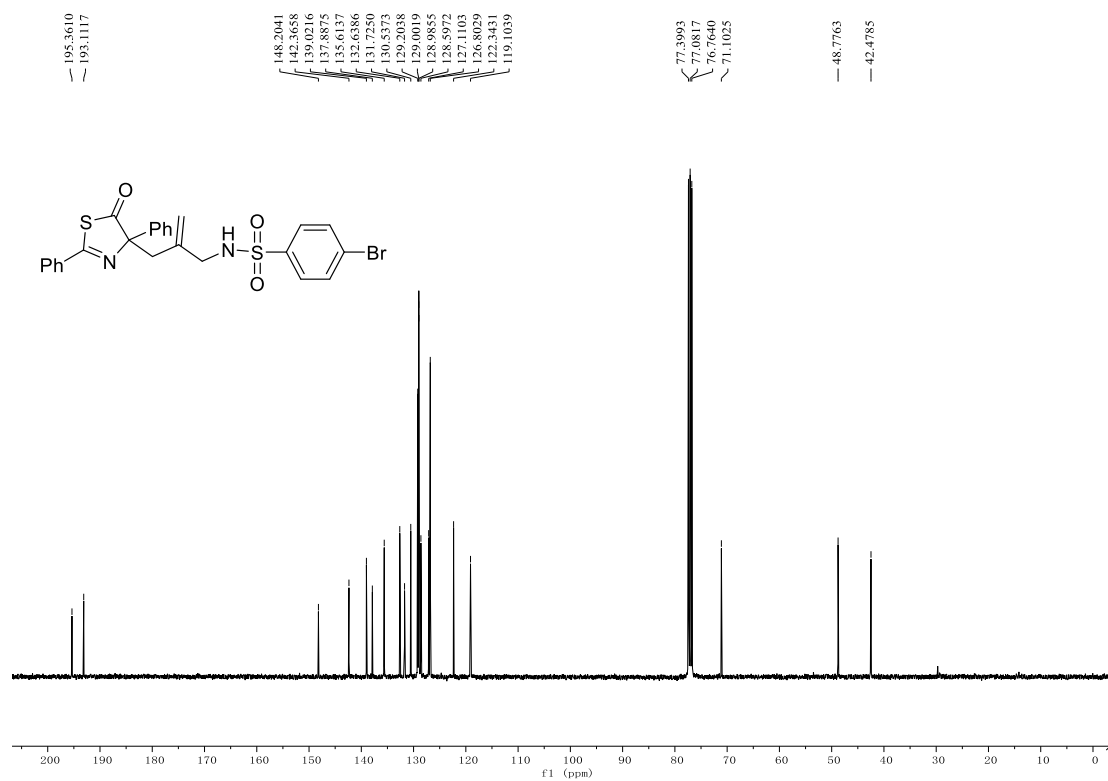

# <sup>1</sup>H and <sup>13</sup>C NMR spectra for compound 3l

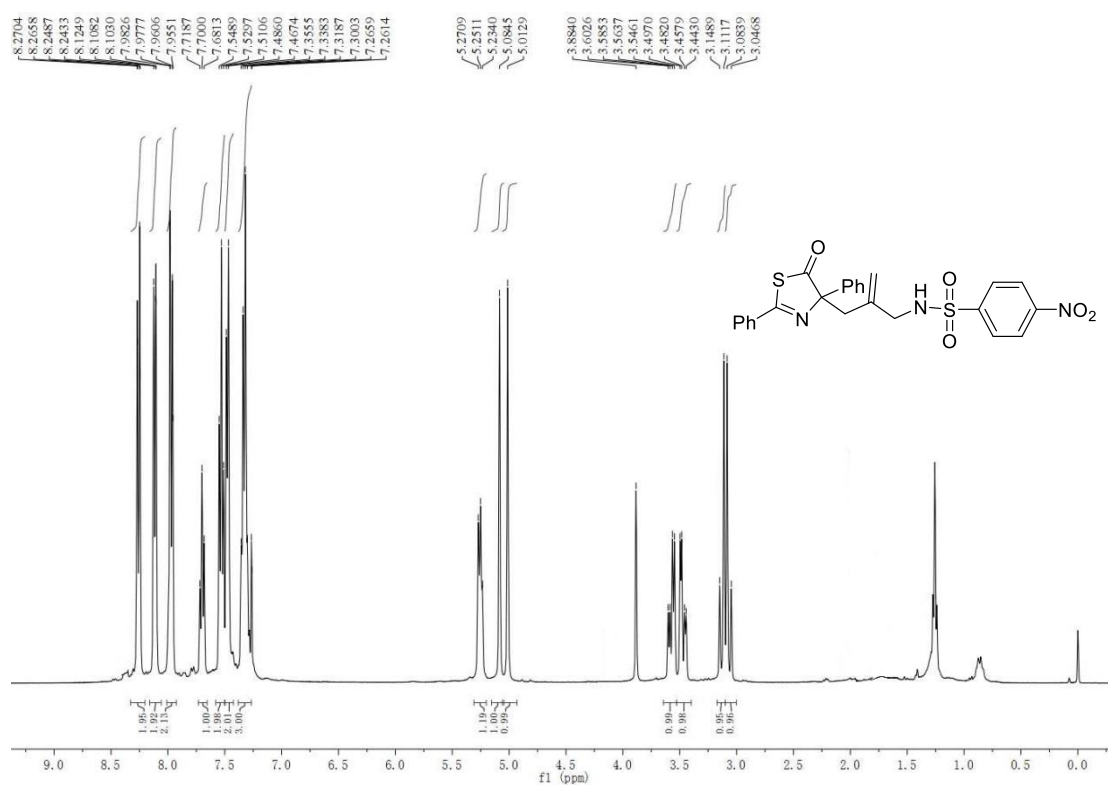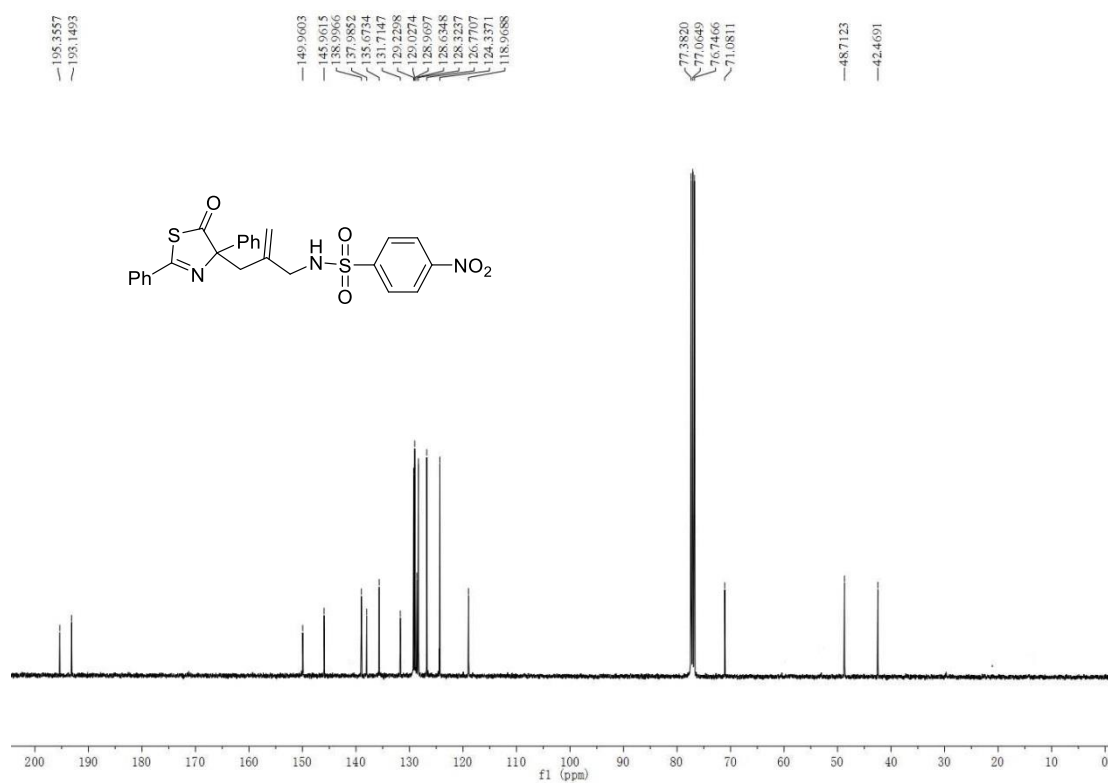

**$^1\text{H}$  and  $^{13}\text{C}$  NMR spectra for compound 3m**

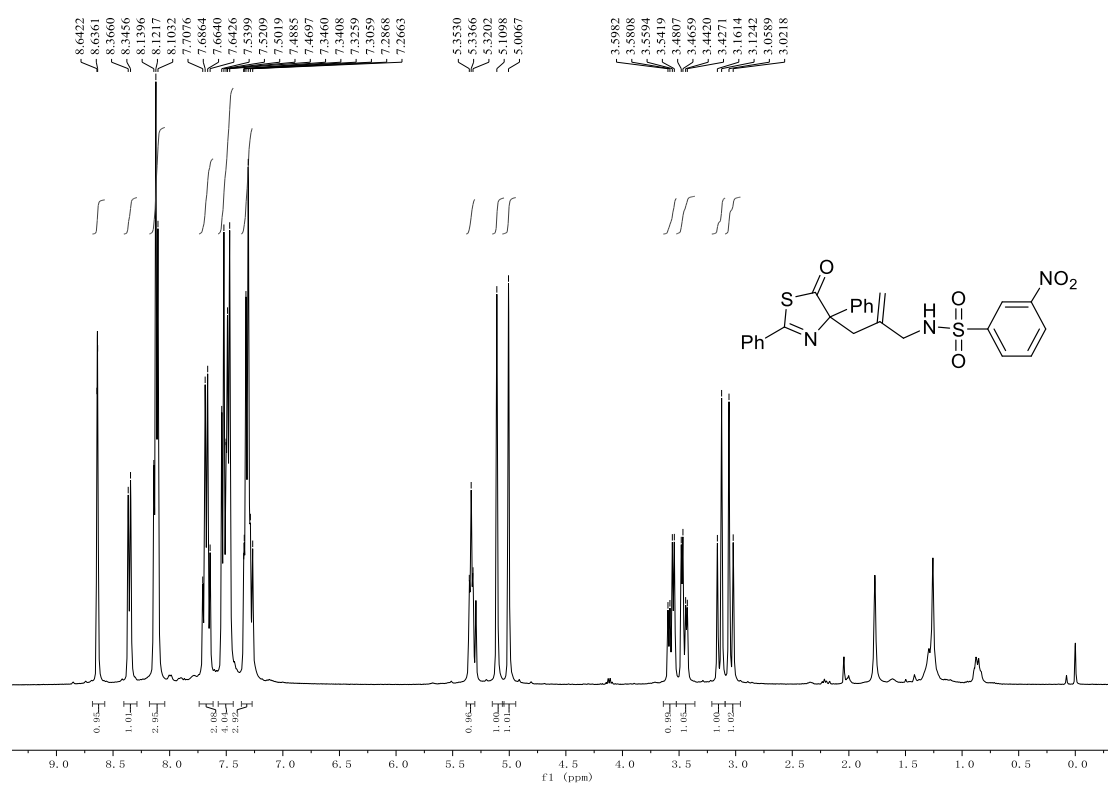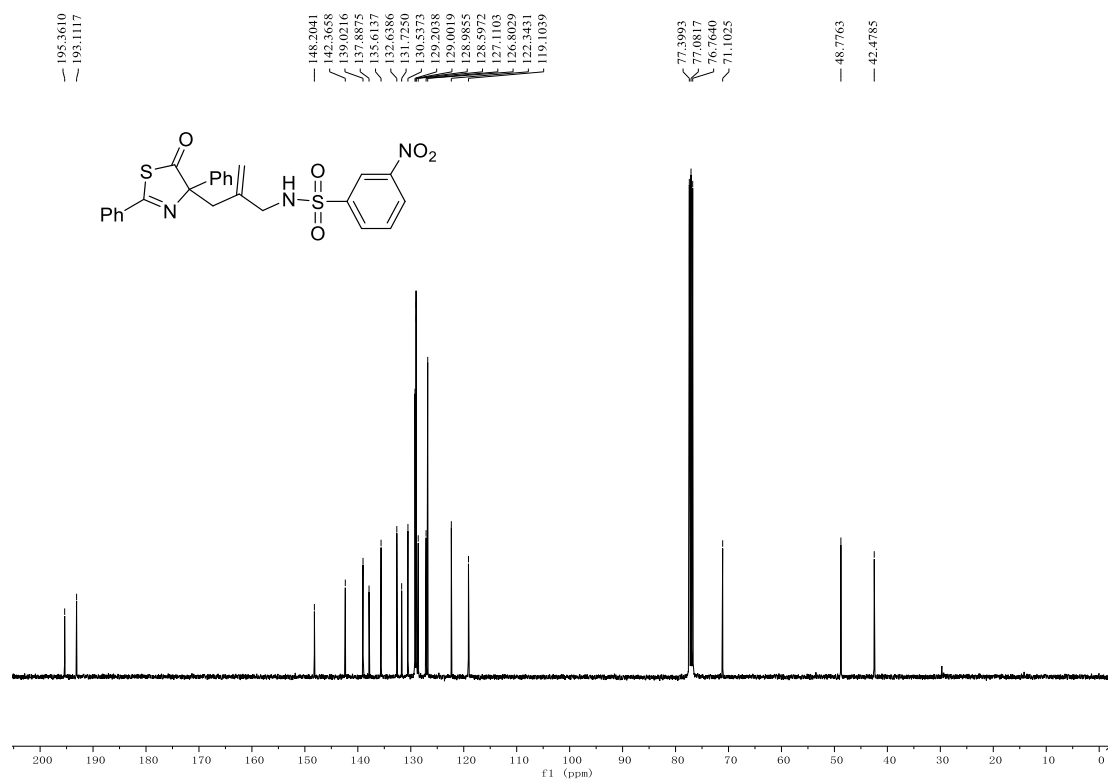

**$^1\text{H}$  and  $^{13}\text{C}$  NMR spectra for compound 5a**

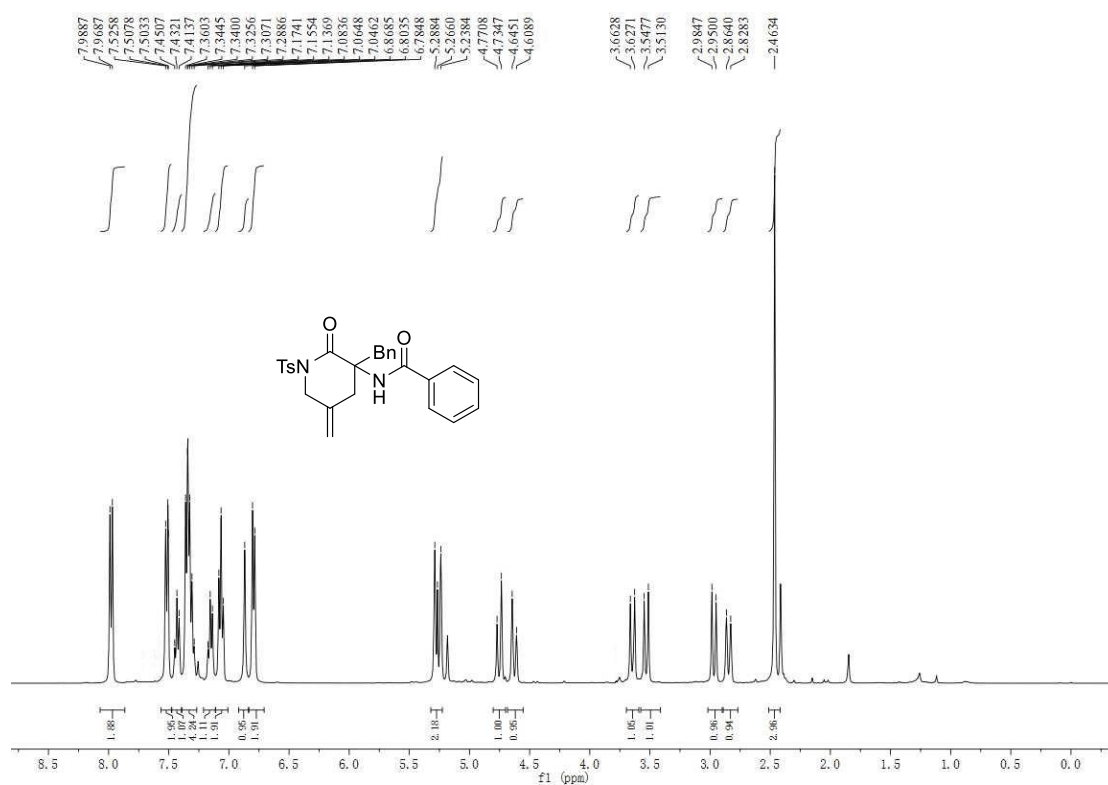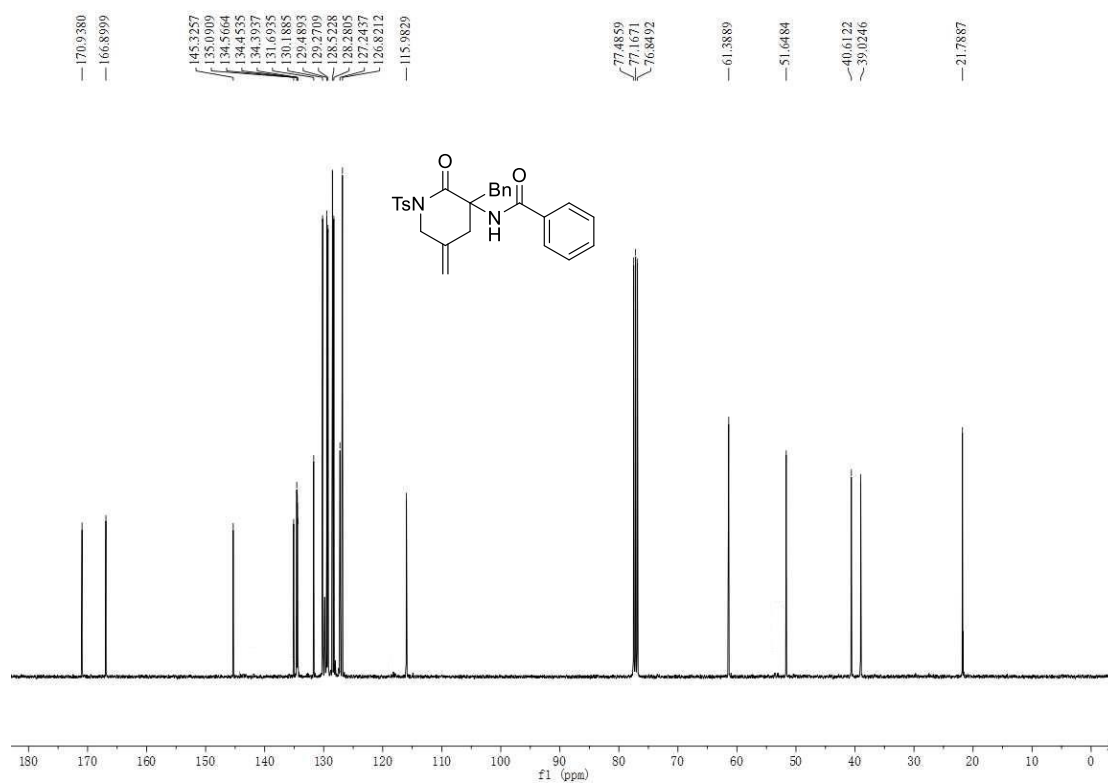

# <sup>1</sup>H and <sup>13</sup>C NMR spectra for compound 5b

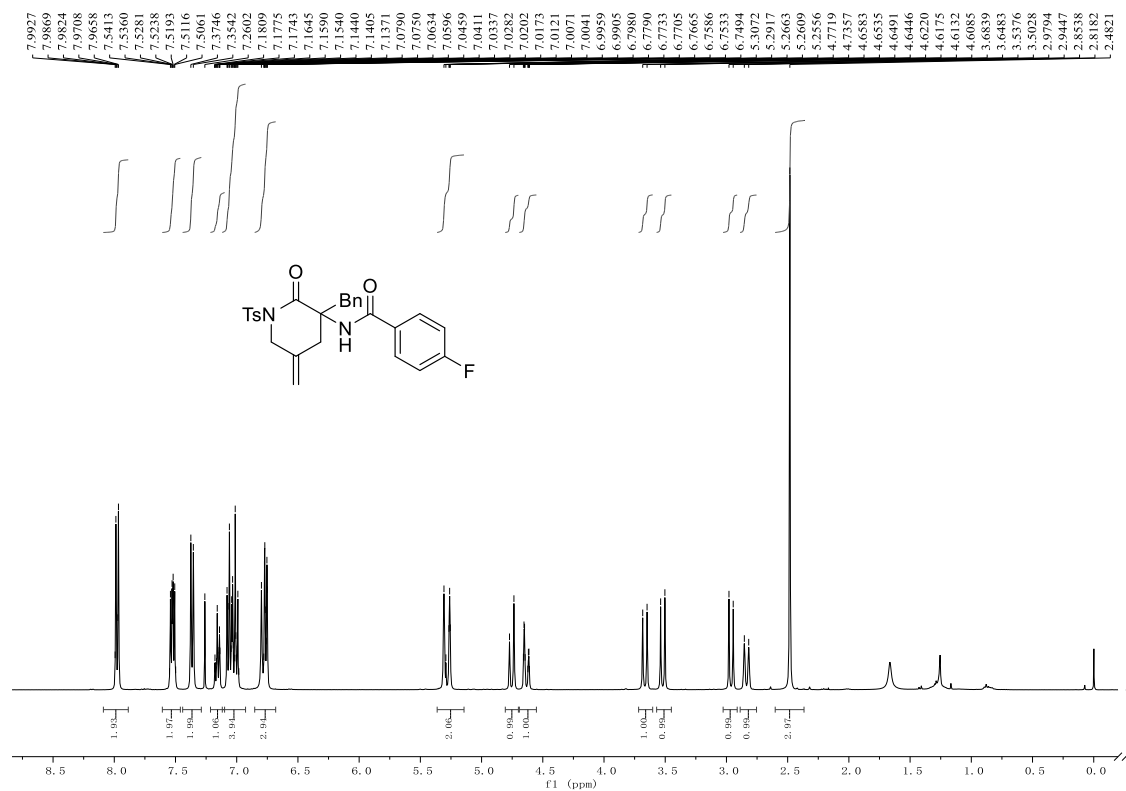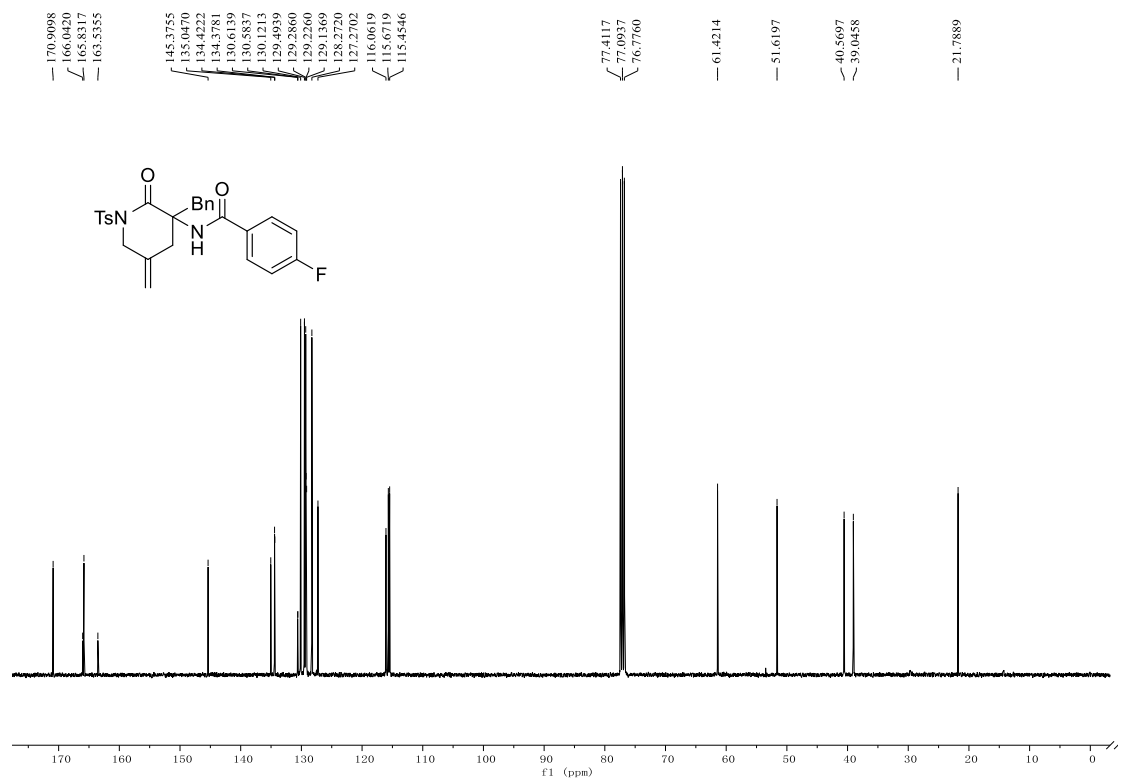

**$^{19}\text{F}$  NMR spectra for compound 5b**

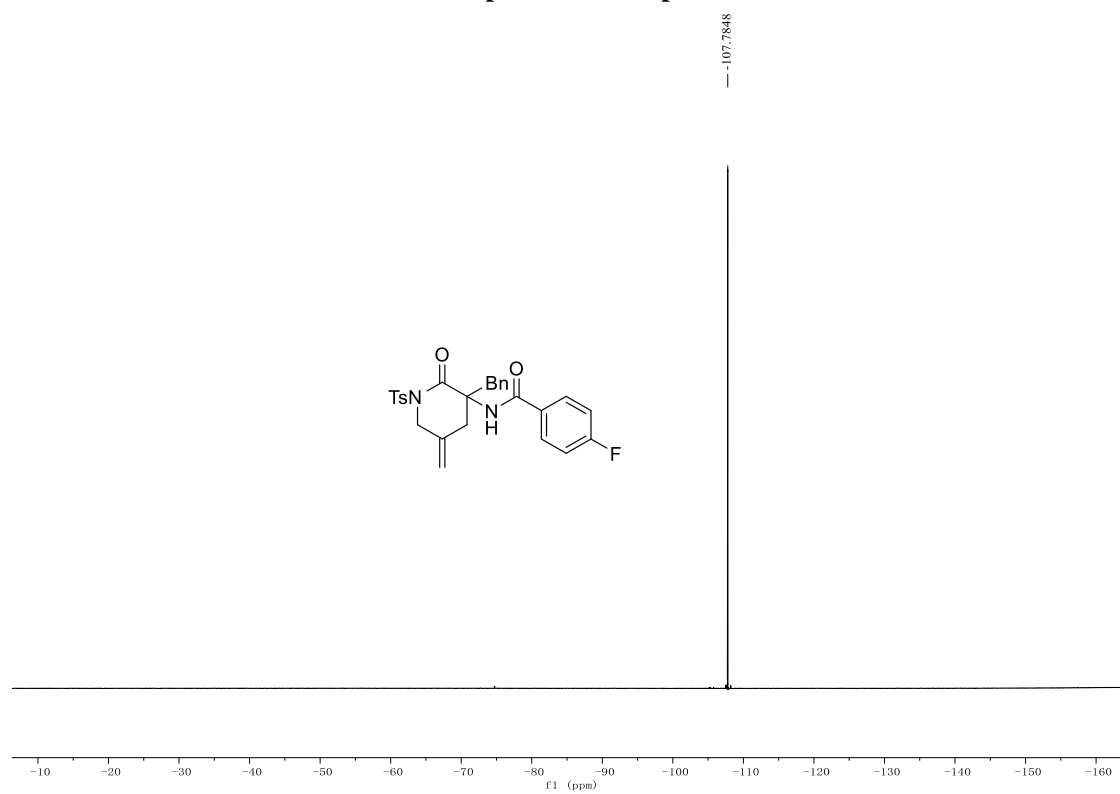

# <sup>1</sup>H and <sup>13</sup>C NMR spectra for compound 5c

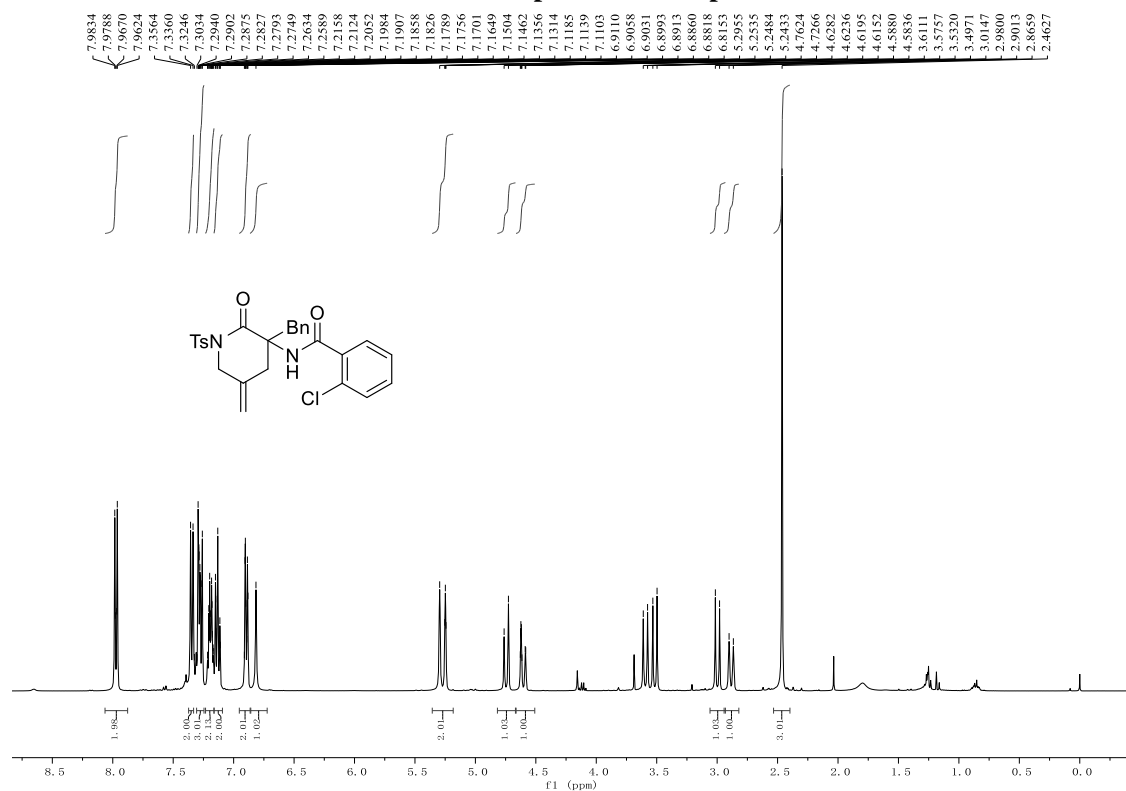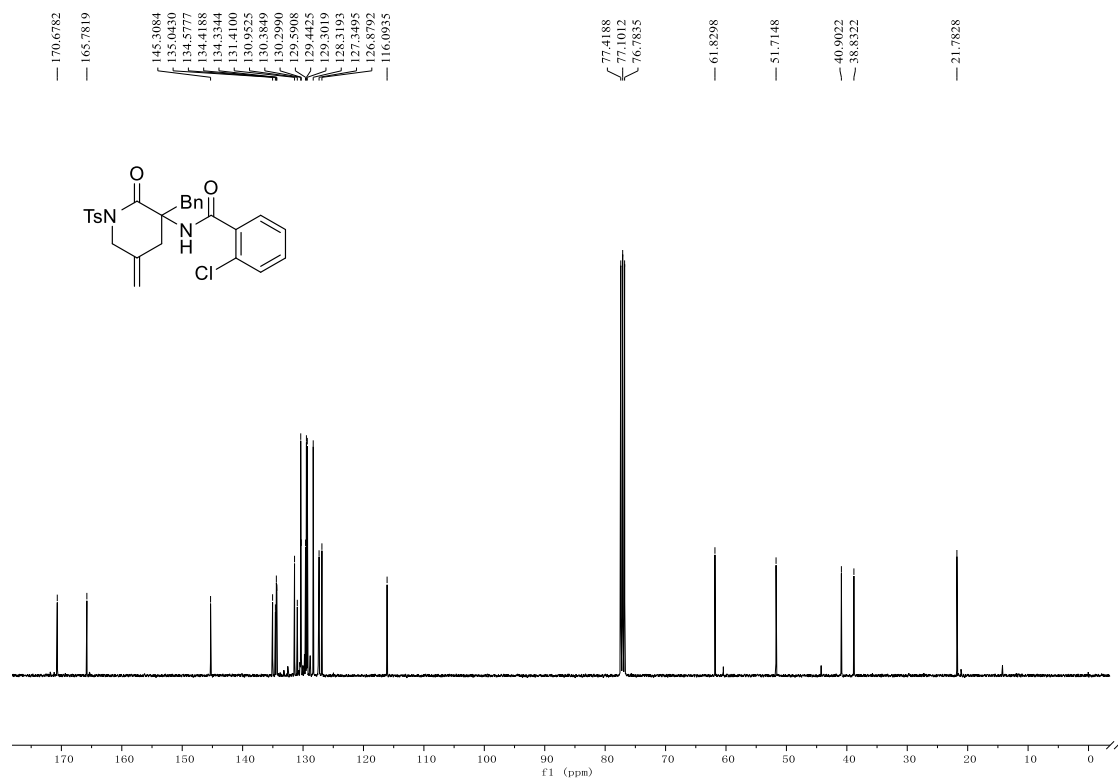

**$^1\text{H}$  and  $^{13}\text{C}$  NMR spectra for compound 5d**

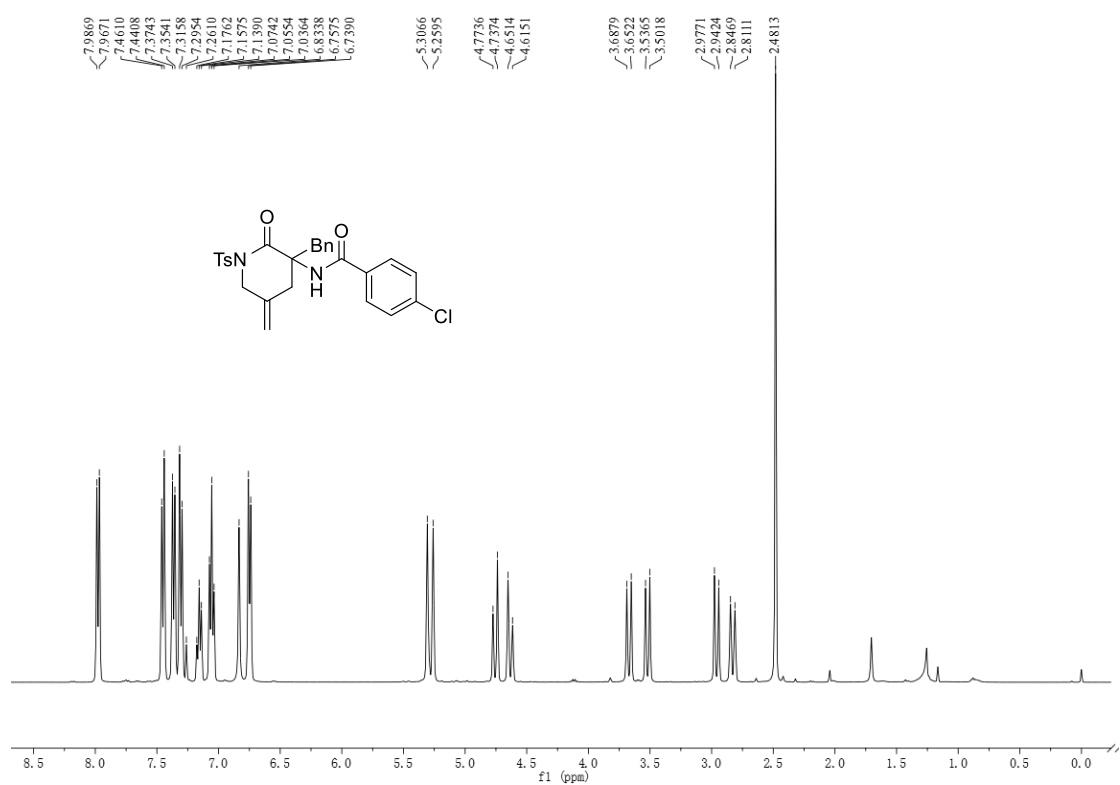

# <sup>1</sup>H and <sup>13</sup>C NMR spectra for compound 5e

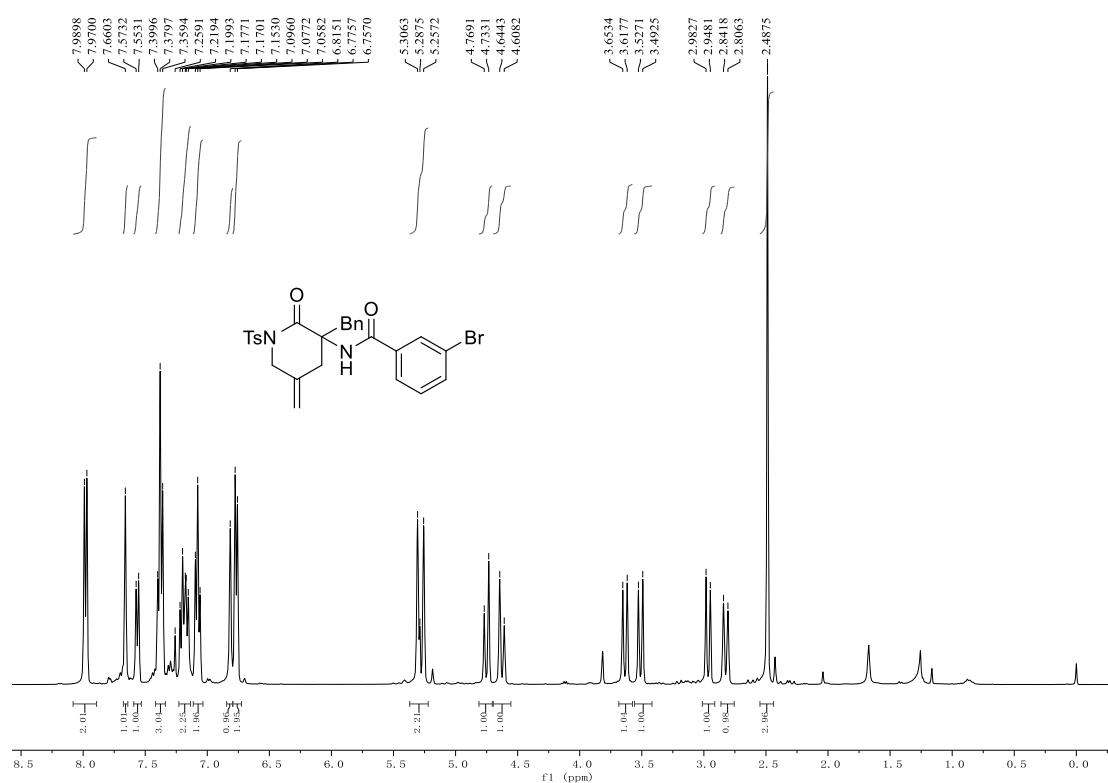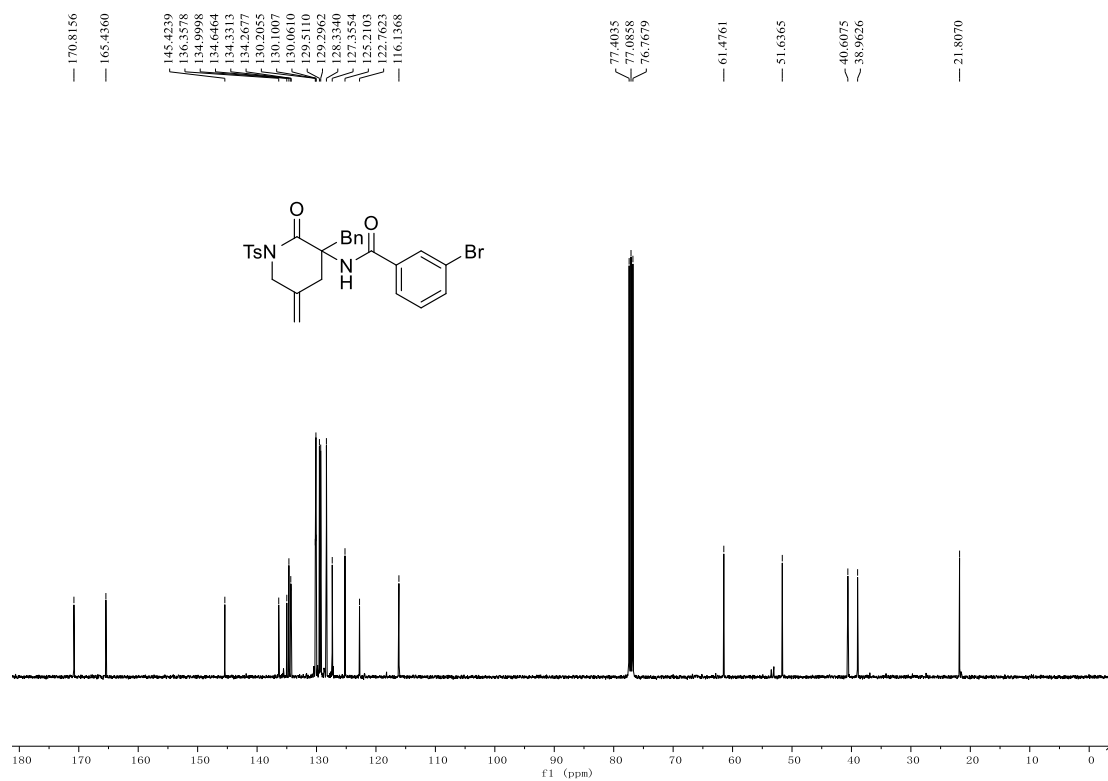

**<sup>1</sup>H and <sup>13</sup>C NMR spectra for compound 5f**

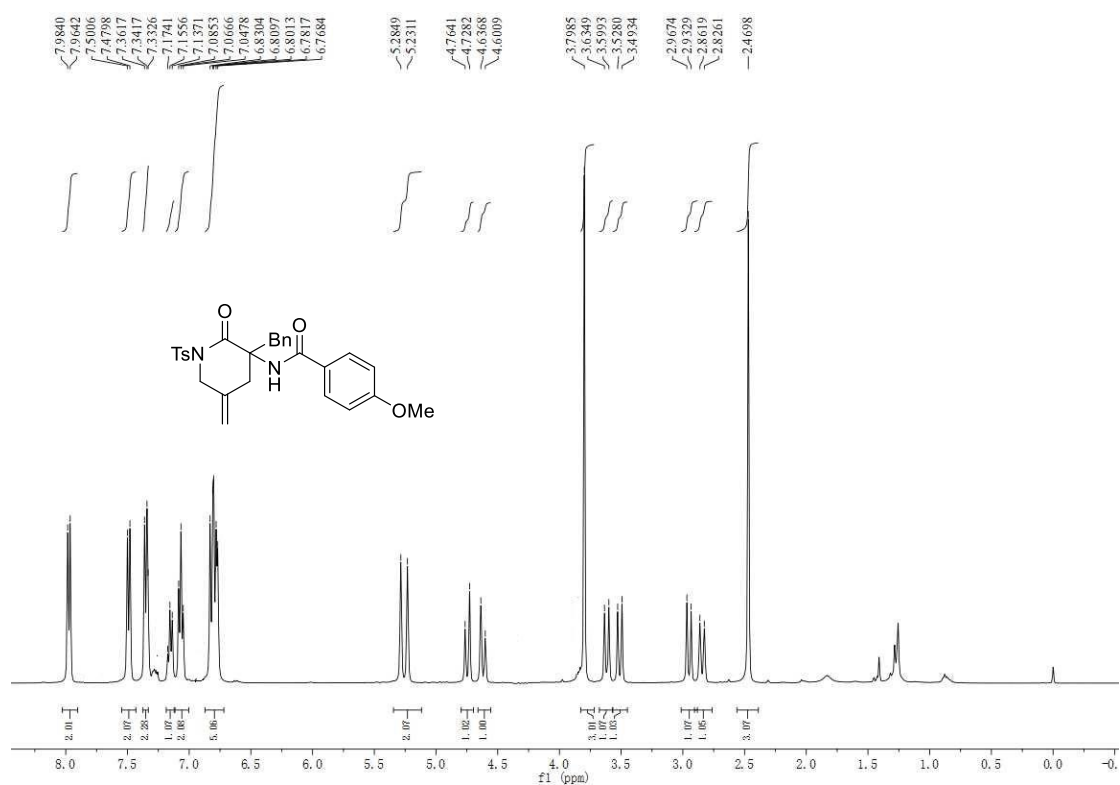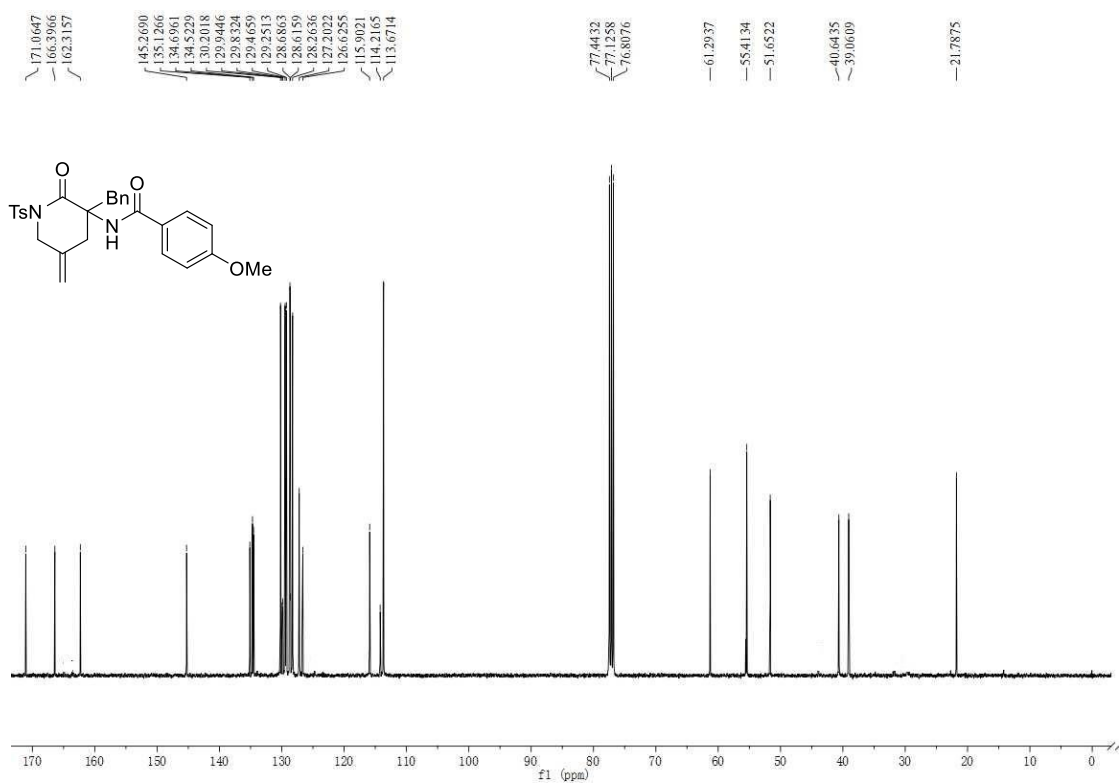

# <sup>1</sup>H and <sup>13</sup>C NMR spectra for compound 5g

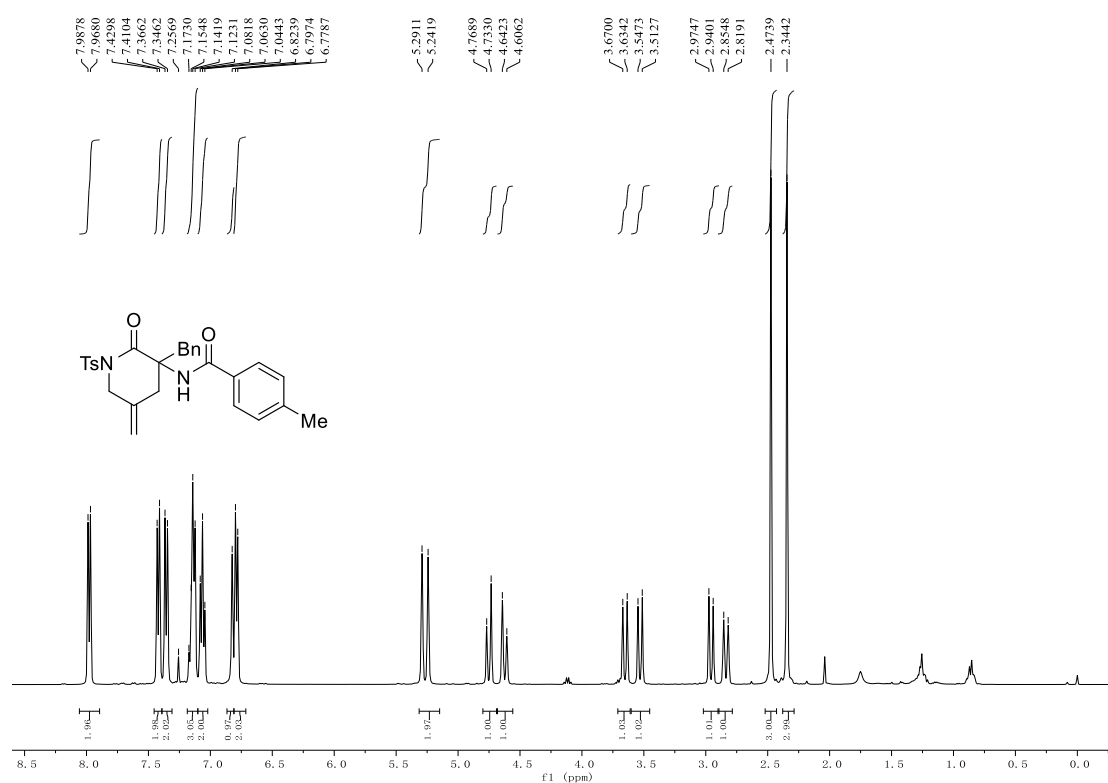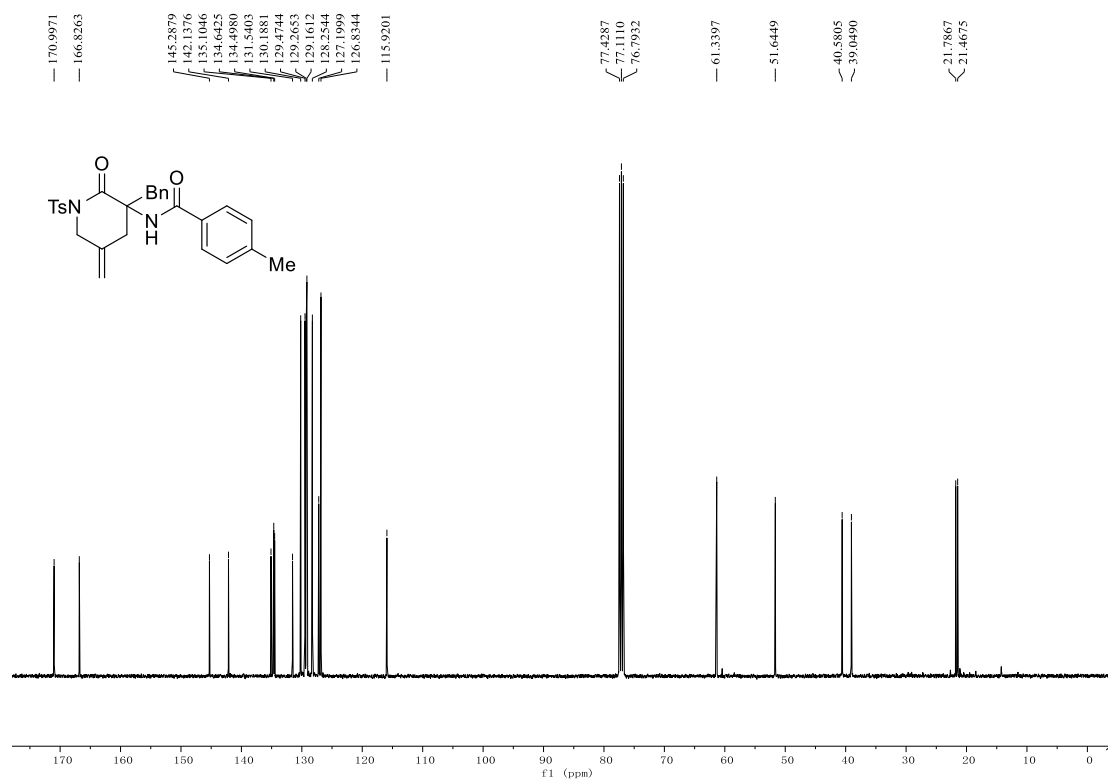

# <sup>1</sup>H and <sup>13</sup>C NMR spectra for compound 5h

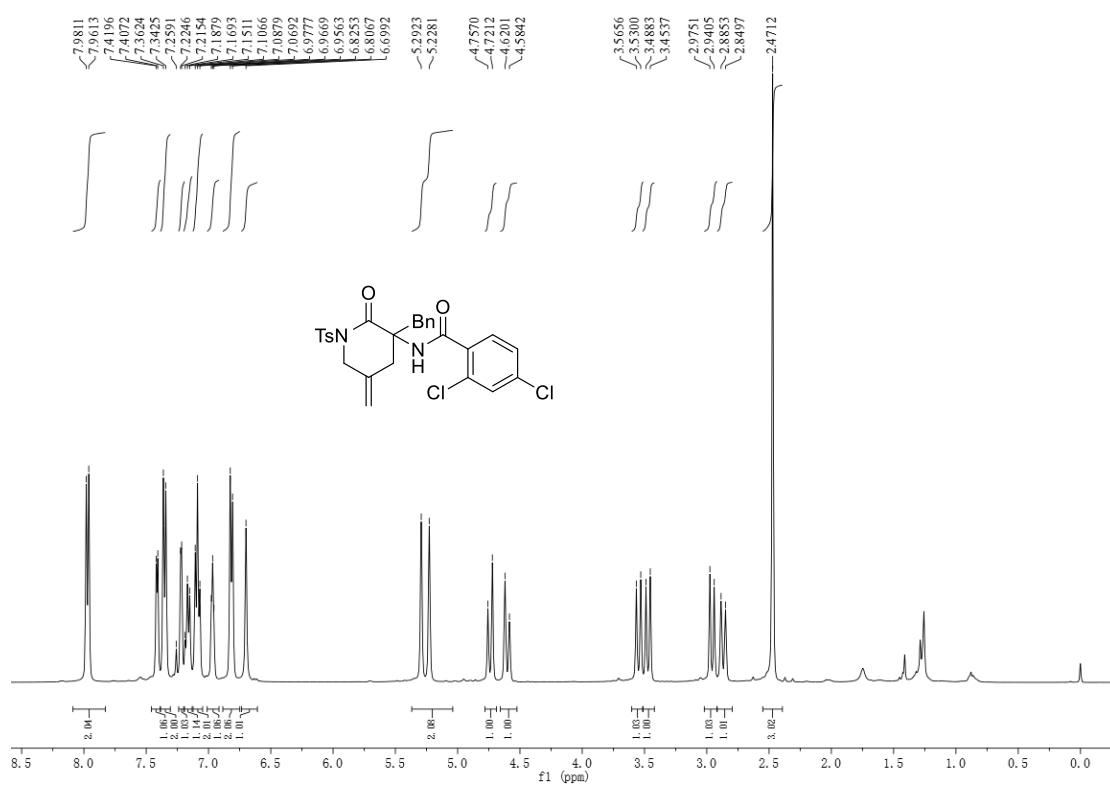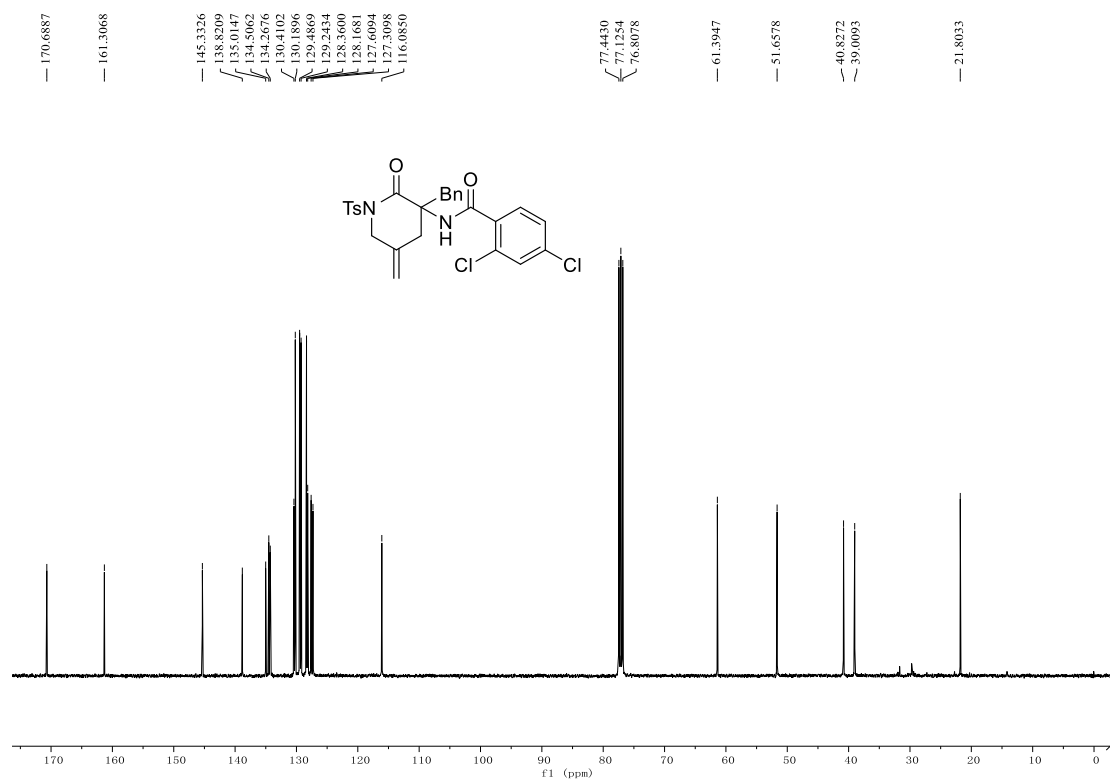

# <sup>1</sup>H and <sup>13</sup>C NMR spectra for compound 5i

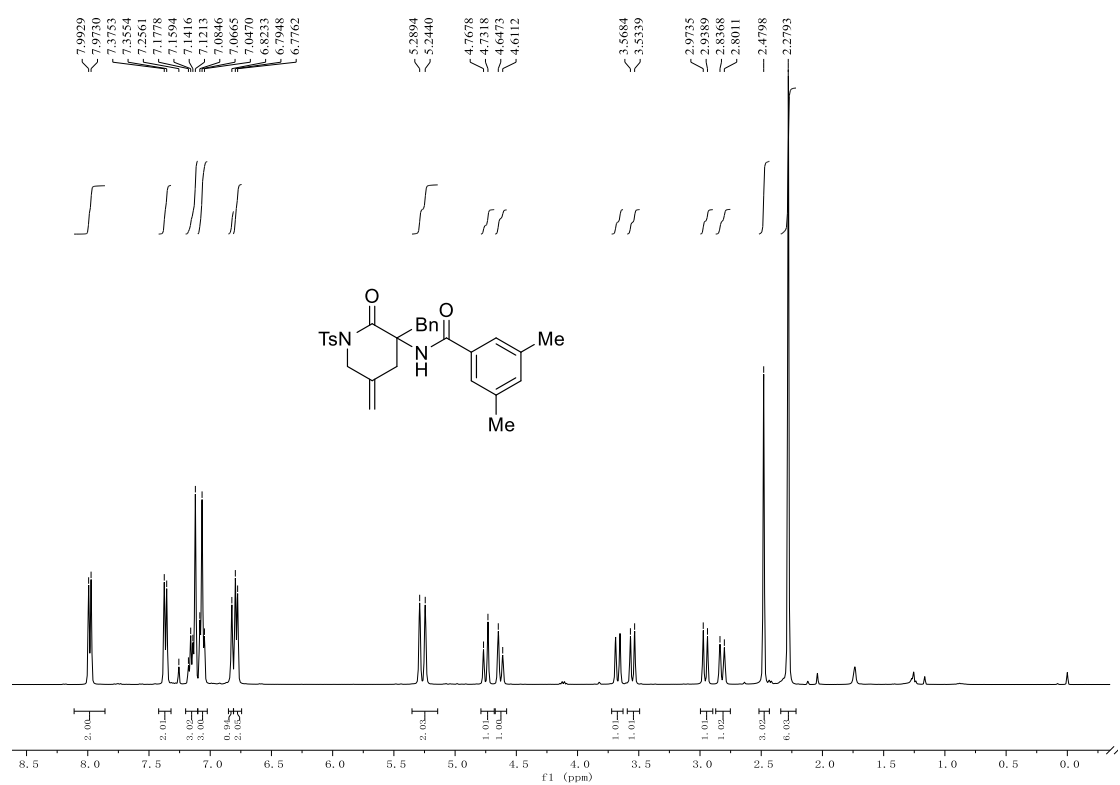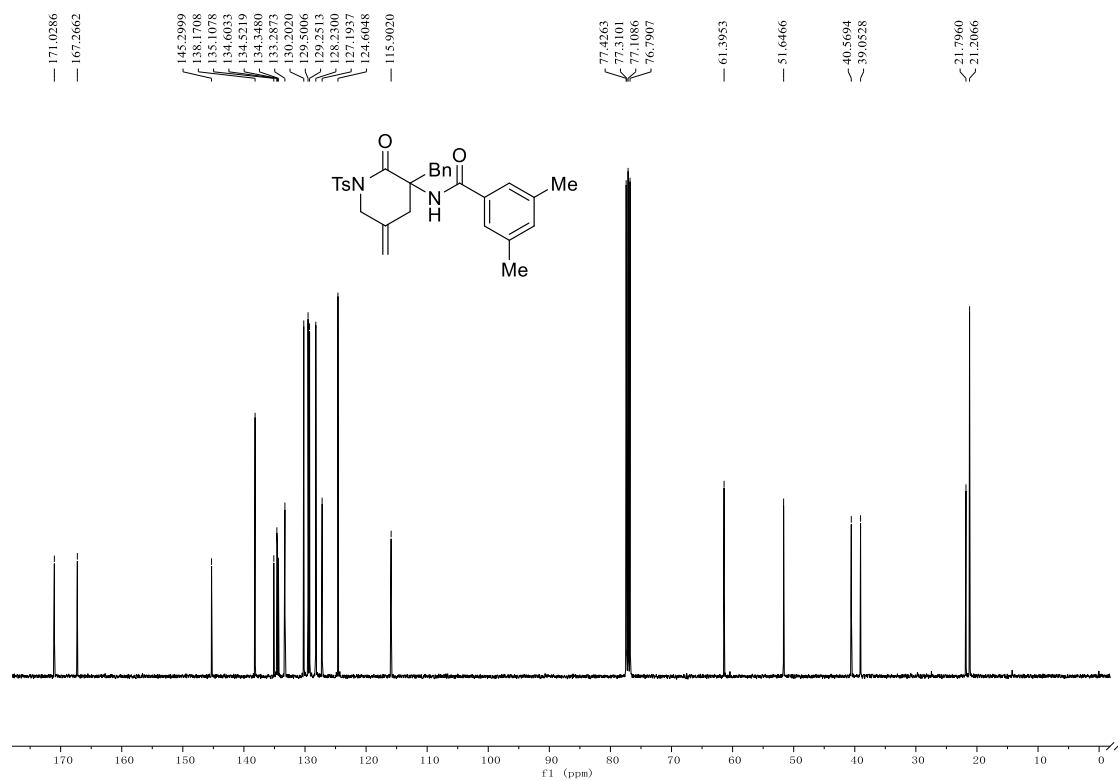

# <sup>1</sup>H and <sup>13</sup>C NMR spectra for compound 5j

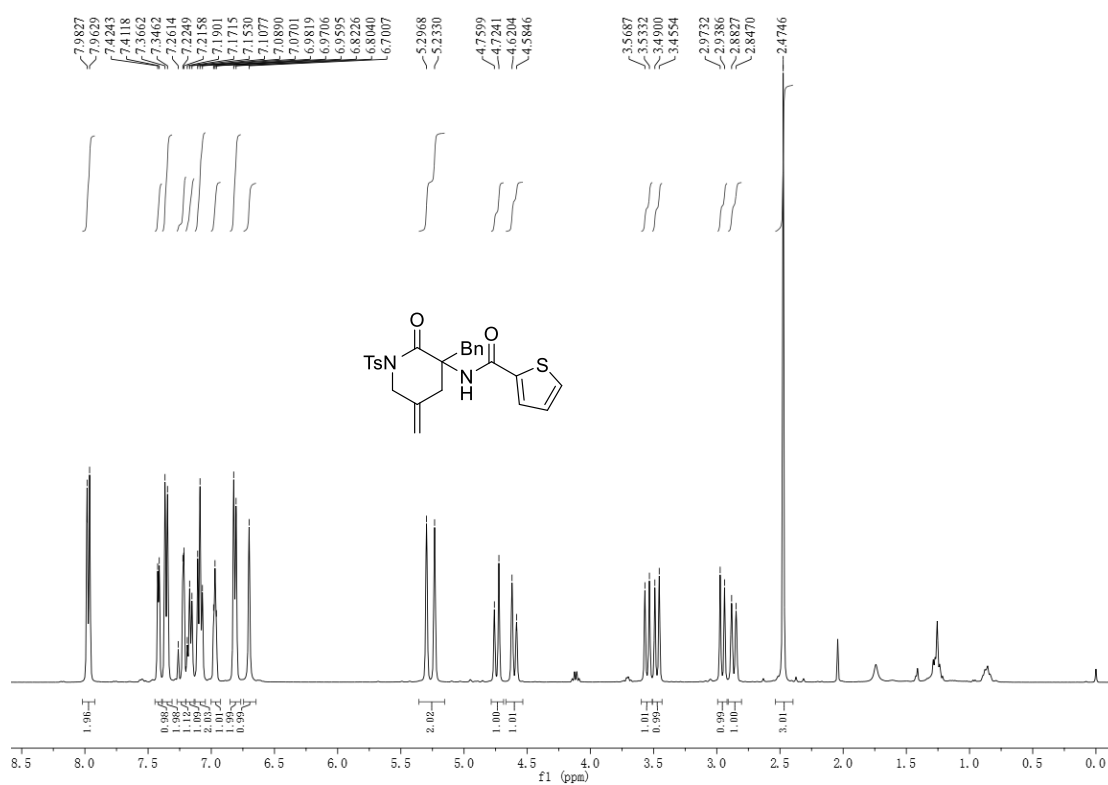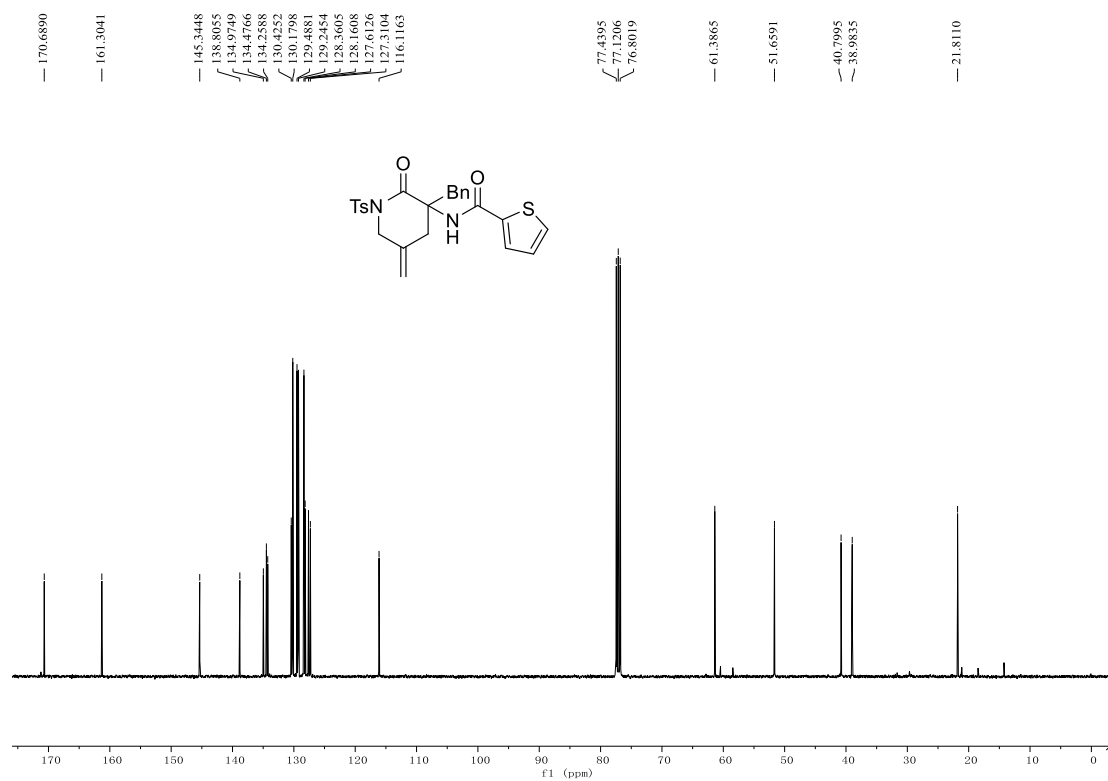

# <sup>1</sup>H and <sup>13</sup>C NMR spectra for compound 5k

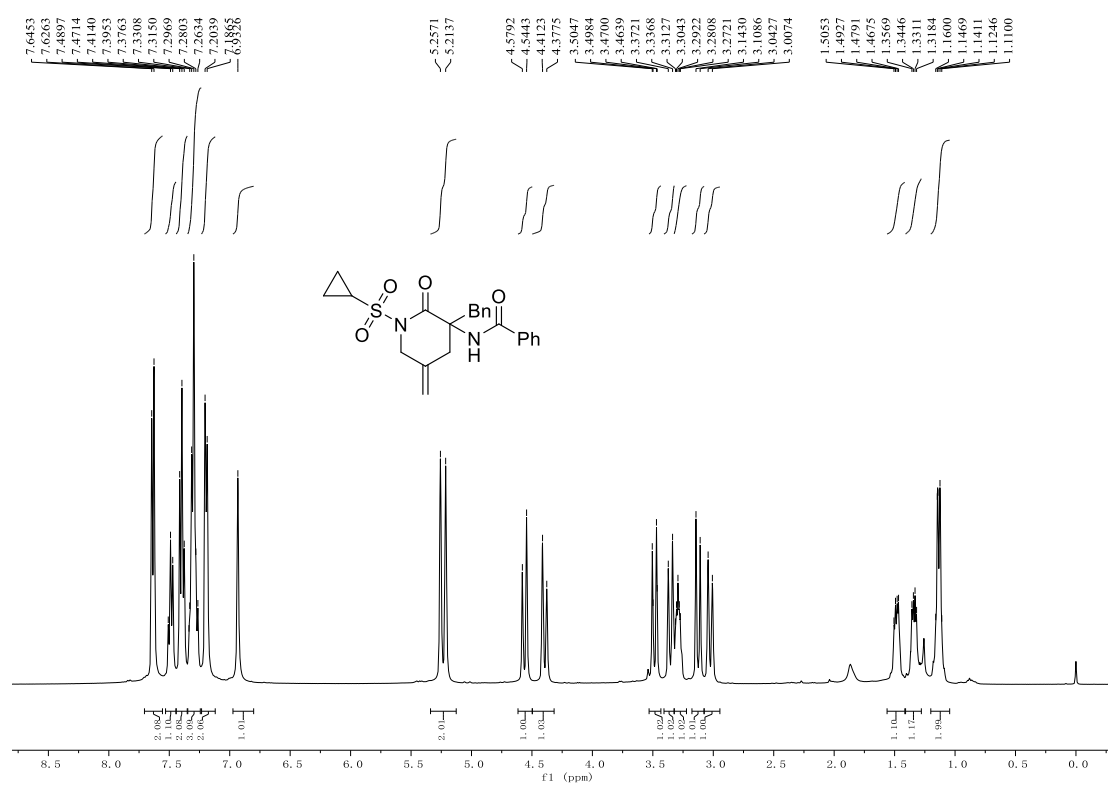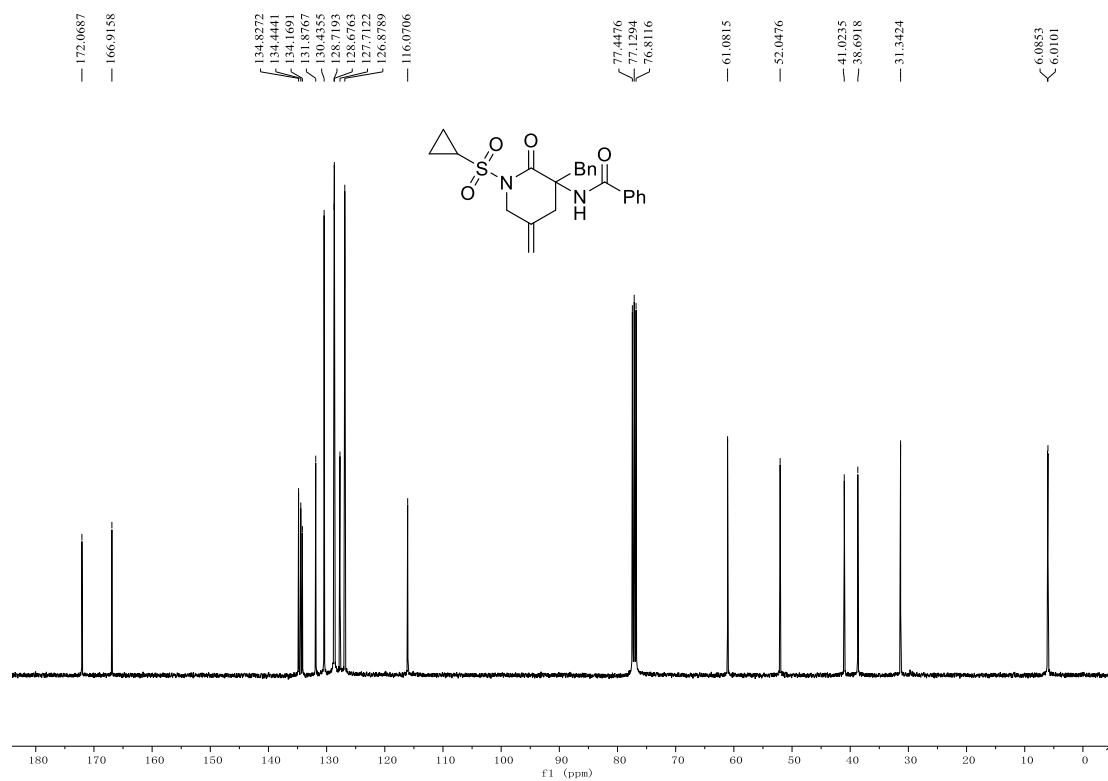

# <sup>1</sup>H and <sup>13</sup>C NMR spectra for compound 5l

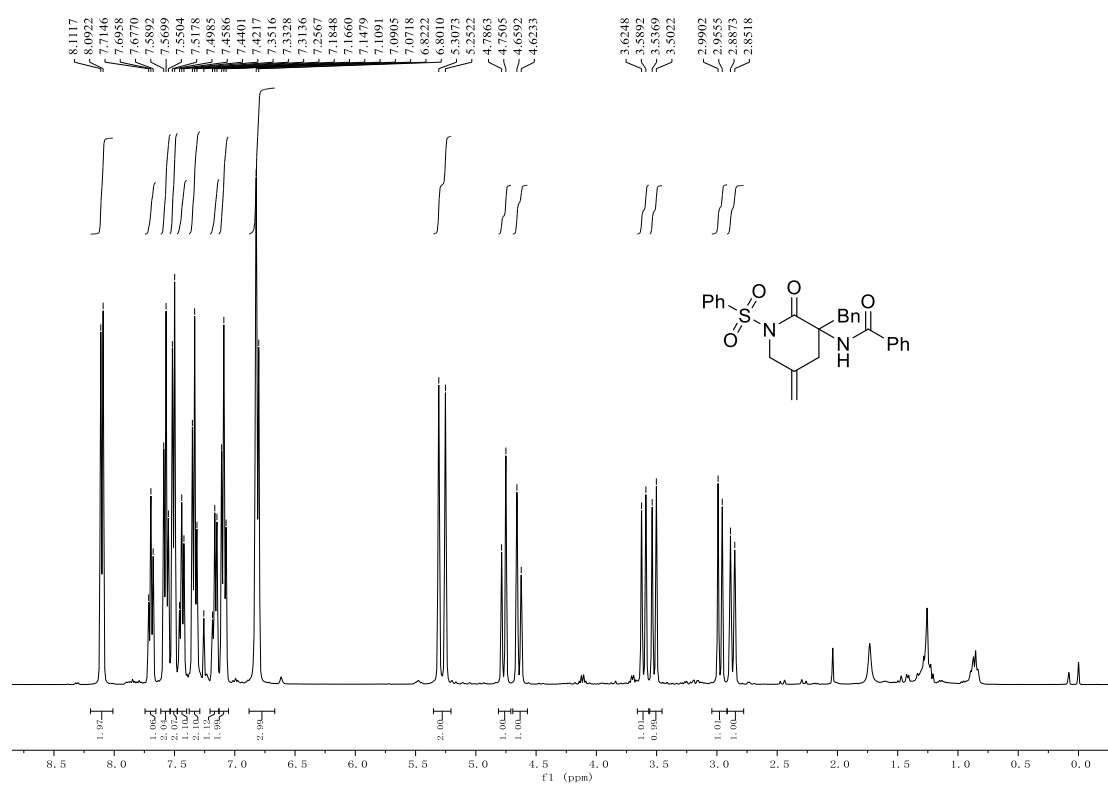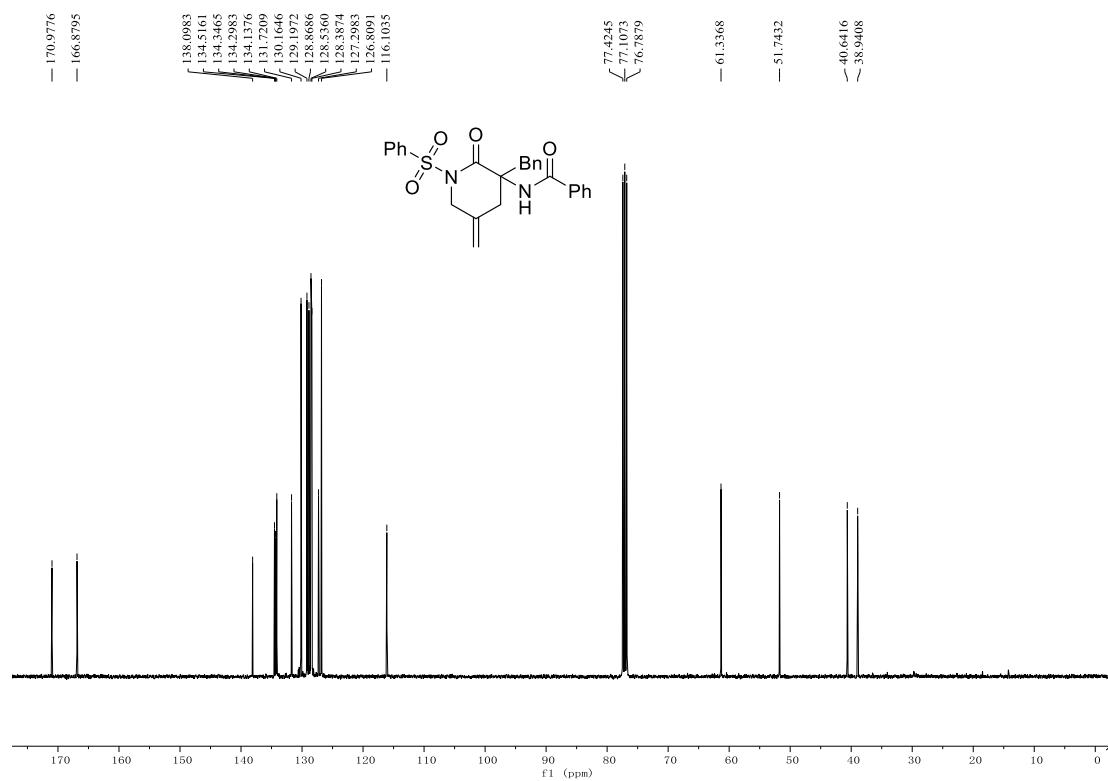

# <sup>1</sup>H and <sup>13</sup>C NMR spectra for compound 5m

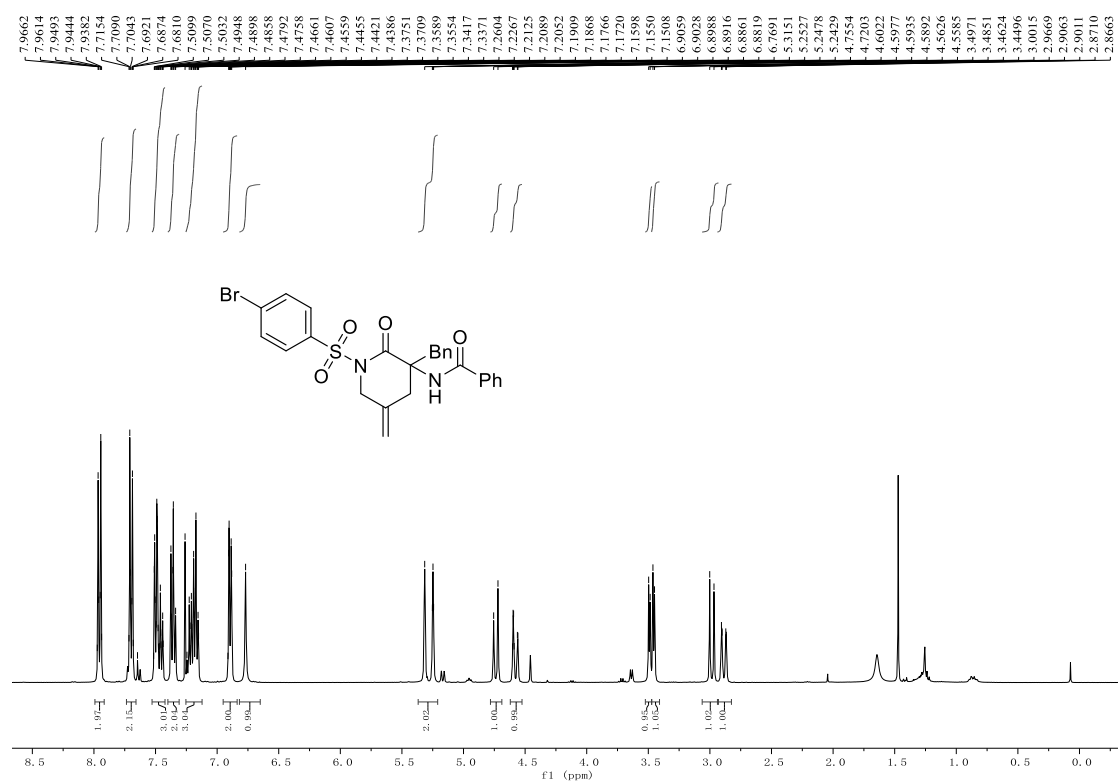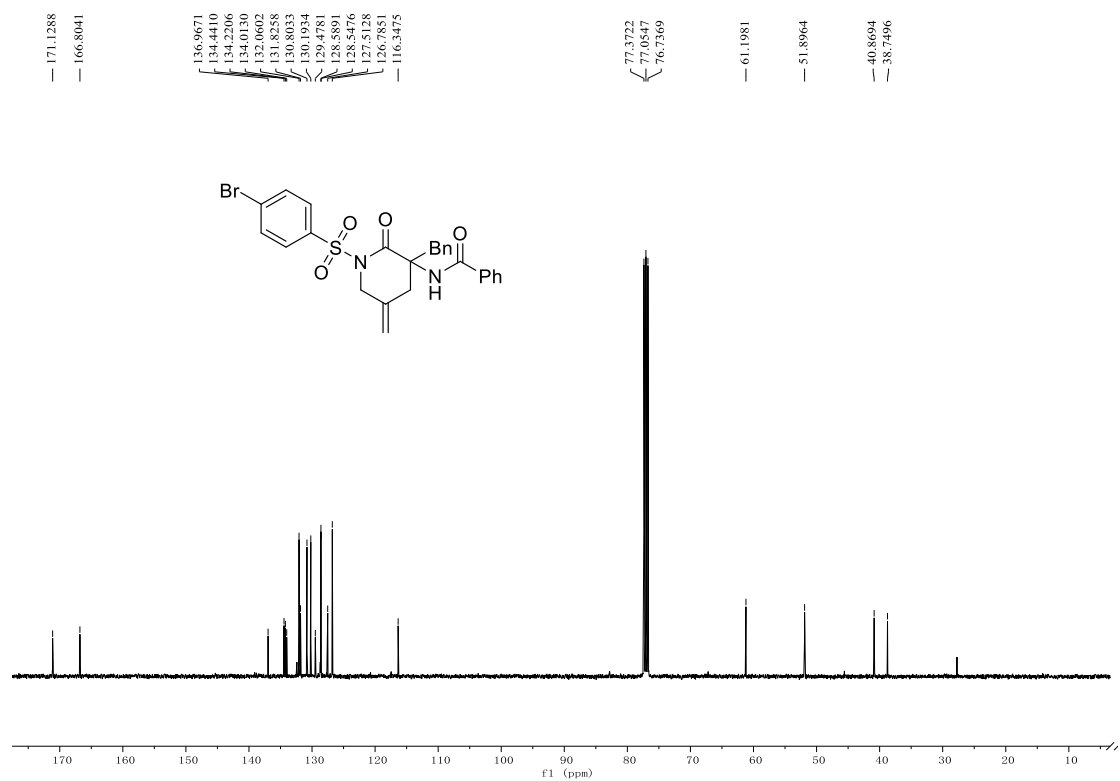

# <sup>1</sup>H and <sup>13</sup>C NMR spectra for compound 5n

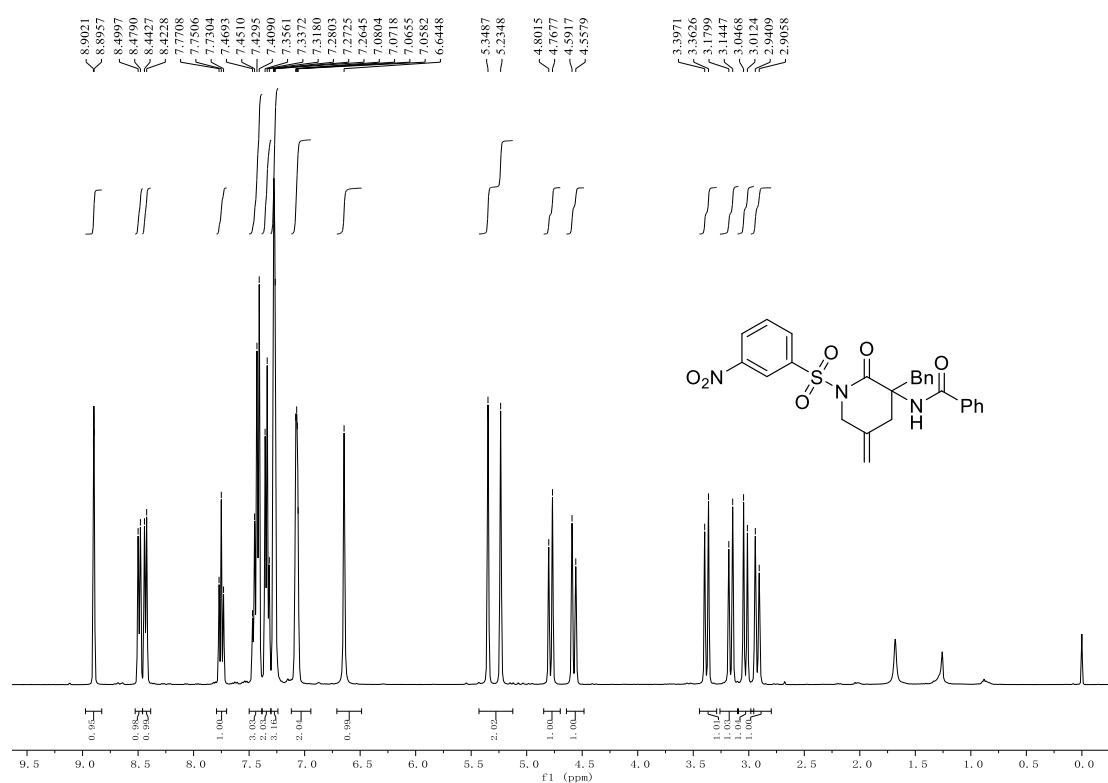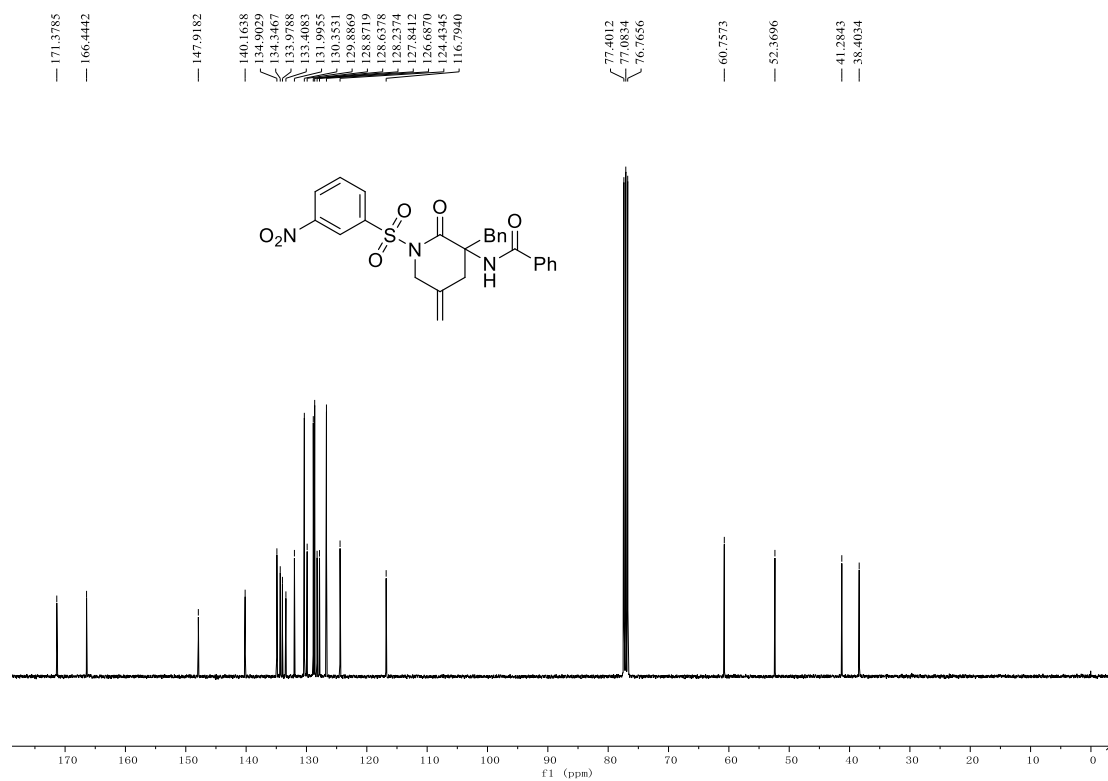

### <sup>1</sup>H and <sup>13</sup>C NMR spectra for compound 6

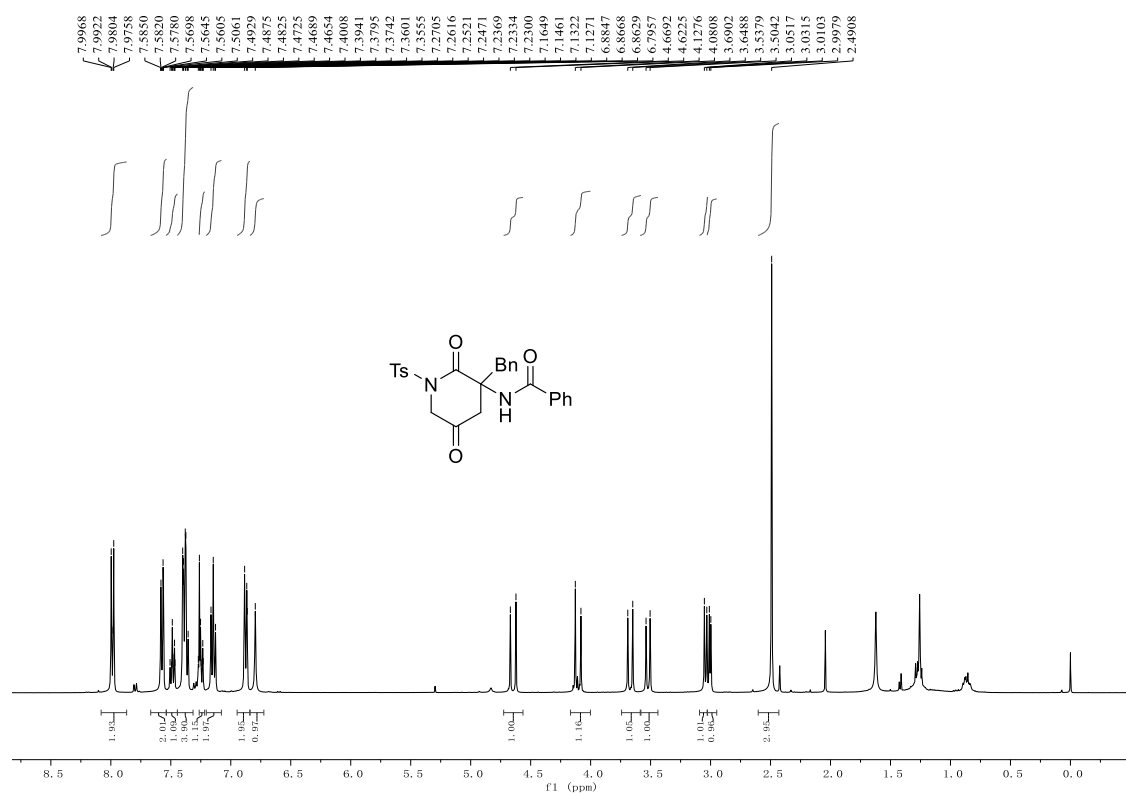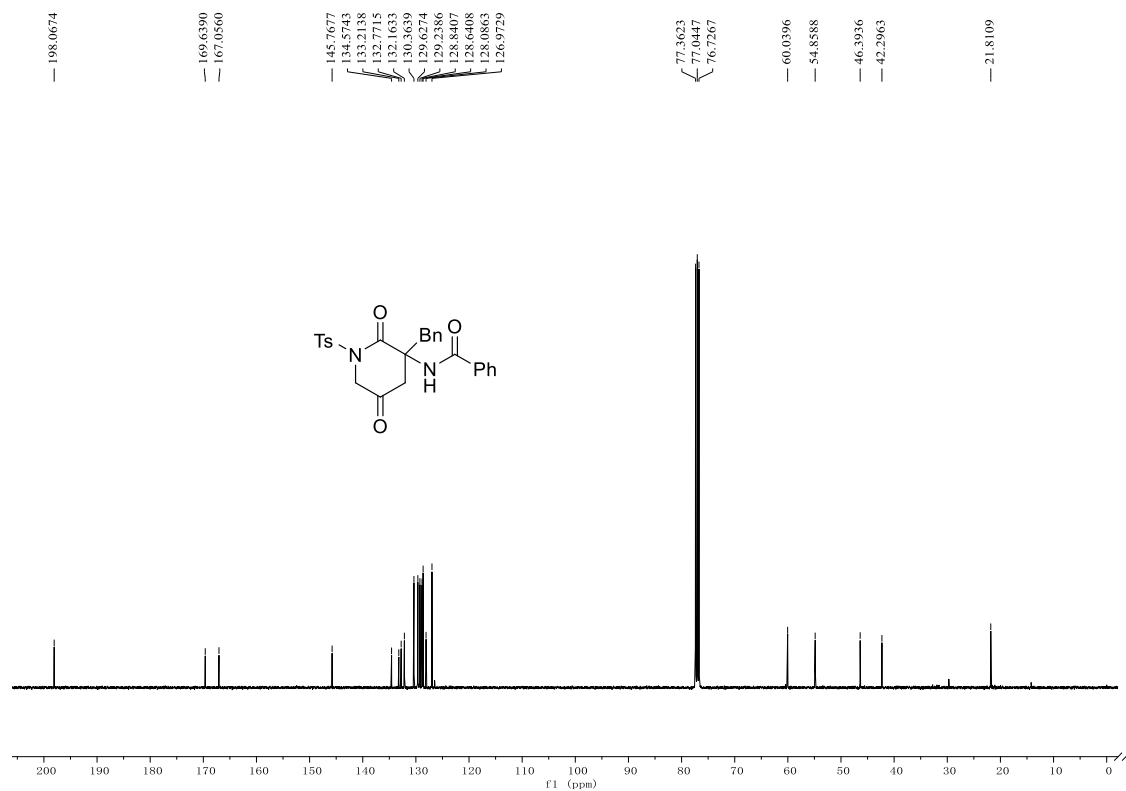

Supplement: d3ob01404e1.pdf [file d3ob01404e1.pdf]
